1           **Mating Induces Switch From Hormone-Dependent to –**  
2           **Independent Steroid Receptor-Mediated Growth in**  
3           ***Drosophila* Prostate-Like Cells**

4  
5   Aaron Leiblich<sup>1,2\*</sup>, Josephine E. E. U. Hellberg<sup>1\*</sup>, Aashika Sekar<sup>1</sup>, Carina Gandy<sup>1</sup>, Siamak  
6   Redhai<sup>1</sup>, Mark Wainwright<sup>1</sup>, Pauline Marie<sup>1</sup>, Deborah C. I. Goberdhan<sup>1</sup>, Freddie C. Hamdy<sup>2</sup>,  
7   Clive Wilson<sup>1</sup>

8   Affiliations: <sup>1</sup>Department of Physiology, Anatomy and Genetics, University of Oxford;  
9   <sup>2</sup>Nuffield Department of Surgical Sciences, University of Oxford.

10

11   \*These authors contributed equally to this work

12   Character count = 47,736

13   Running title: Mating-induced switch in steroid receptor signalling in fly prostate

14   Keywords: accessory gland / endoreplication / ecdysone / seminal fluid / steroid signalling

15

16 **Abstract**

17 Male reproductive glands like the mammalian prostate and the paired *Drosophila*  
18 *melanogaster* accessory glands secrete seminal fluid components that enhance  
19 fecundity. In humans, the prostate grows throughout adult life, stimulated by  
20 environmentally regulated endocrine and local androgens. We previously showed  
21 that in each fly accessory gland, secondary cells (SCs) and their nuclei also grow in  
22 adults, a process enhanced by mating and controlled by bone morphogenetic  
23 protein (BMP) signalling. Here we demonstrate that BMP-mediated SC growth is  
24 dependent on the receptor for the developmental steroid, ecdysone, whose  
25 concentration reflects socio-sexual experience in adults. BMP signalling regulates  
26 ecdysone receptor (EcR) levels post-transcriptionally, partly via EcR's N-terminus.  
27 Nuclear growth in virgin males is ecdysone-dependent. However, mating activates  
28 genome endoreplication to drive additional BMP-mediated nuclear growth via a cell  
29 type-specific form of hormone-independent EcR signalling. In virgin males with low  
30 ecdysone levels, this mechanism ensures resources are conserved. However, by  
31 switching to hormone-independence after mating, this control is overridden to  
32 hyper-activate growth of secretory secondary cells. Our data suggest parallels  
33 between this physiological, behaviour-induced switch and altered pathological  
34 signalling associated with prostate cancer progression.

35

36

## 37 Introduction

38 In all higher organisms where fertilisation takes place in the female reproductive  
39 tract, males not only deliver sperm to females, but also transfer seminal fluid,  
40 containing a cocktail of molecules that optimise fecundity. For example, secretions  
41 from the mammalian prostate and seminal vesicles contribute most of the seminal  
42 fluid volume, activate sperm [1] and promote embryo implantation [2]. The paired  
43 accessory glands (AGs) in the fruit fly, *Drosophila melanogaster*, perform related  
44 functions and can also substantially alter female behaviour after mating, increasing  
45 egg laying, promoting sperm storage and reducing female receptivity to subsequent  
46 mating attempts [3-6]. Most of the key accessory gland proteins (Acps) involved,  
47 such as Sex Peptide, which plays a central role in driving female post-mating  
48 responses, are secreted by about 1000 so-called main cells (MCs) found in the mono-  
49 layered AG epithelium [7,8]. However, secondary cells (SCs), a small population of  
50 about 40 epithelial cells at the distal tip of each AG (Fig. 1A), also play an essential  
51 role [9-11].

52 As humans age, the prostate epithelium frequently becomes hyperplastic. Indeed,  
53 many males over the age of 65 develop symptomatic benign prostatic hyperplasia  
54 [12]. SCs are not proliferative, but they also grow in adults, unlike other cells in the  
55 AG [9]. Mating enhances this growth, which is most easily assayed by measuring  
56 nuclear size. Interestingly, we have found that autocrine BMP signalling is crucial for  
57 the normal, age-dependent growth of SCs both in virgin and mated males [9].  
58 Growth of SCs involves elevated synthesis of macromolecules including secreted  
59 proteins. Inhibition of BMP signalling specifically in adult SCs reduces the ability of

60 males to suppress female re-mating. Furthermore, BMP signalling promotes  
61 secretion of the contents of large dense-core granule-containing compartments [13]  
62 and of exosomes, nano-vesicles formed inside endosomal compartments that are  
63 released by fusion of these compartments to the plasma membrane [14]. These  
64 exosomes appear to be involved in female behavioural reprogramming, providing at  
65 least part of the explanation for SCs' BMP-dependent effects on females.

66 Although BMP signalling is implicated in mammalian prostate development [15], and  
67 cancer growth and metastasis [16,17], steroid signalling through the androgen  
68 receptor (AR) is thought to be the central regulator of these processes and prostate  
69 hyperplasia [18,19]. Aberrations in steroid signalling are implicated in both benign  
70 and malignant disease of this organ [20,21]. Since androgen levels are modulated by  
71 factors such as nutrition [22] and sexual activity [23], this endocrine input potentially  
72 allows males to adapt prostate function during development, and in response to the  
73 environment and reproductive demands. In advanced cancer, hormone deprivation  
74 therapy effectively blocks tumour growth, but typically within two years, hormone-  
75 independent cells emerge, which frequently still require the AR for growth [24].

76 Flies employ a more limited range of steroid hormones than mammals with the  
77 major characterised steroid hormone, 20-hydroxyecdysone (usually called 20HE or  
78 ecdysone), primarily involved in developmental transitions, particularly during  
79 metamorphosis [25,26]. However, ecdysone levels also fluctuate in adult males in  
80 response to socio-sexual interactions [27]. Ecdysone regulates male courtship  
81 behaviour [28-30], and affects the male germ line [31,32]. Ecdysteroids can also  
82 induce expression of multiple Acp's in AGs [33], and the ecdysone receptor (EcR) is

83 involved in AG development [34]. However, the cells and molecular mechanisms  
84 involved in these processes, as well as the physiological functions of the EcR in adult  
85 AGs, remain unclear. We hypothesised that ecdysone signalling might affect SC  
86 function, providing a socio-sexual environmental input, which complements mating-  
87 dependent growth of SCs.

88 Here we show that the ecdysone receptor (EcR) is specifically expressed in SCs within  
89 the adult AG epithelium, and that EcR signalling in these cells is critical for normal  
90 growth. BMP signalling promotes growth by regulating EcR levels post-  
91 transcriptionally. While nuclear growth in virgin males is BMP-, EcR- and ecdysone-  
92 dependent, most of the EcR-mediated nuclear growth observed after mating is  
93 hormone-independent and specifically drives endoreplication. This novel form of  
94 steroid receptor control in flies permits mating and socio-sexual experience cues to  
95 be flexibly co-ordinated in regulating SC activity, hence employing resources  
96 according to demand.

97

## 98 **Results**

### 99 **The EcR-B1 isoform is expressed exclusively by SCs in the adult AG epithelium**

100 In order to mark and genetically manipulate SCs, we used the SC-specific *esg<sup>ts</sup>F/O*  
101 GAL4 system [35]. It can be activated exclusively in adults through inactivation of a  
102 ubiquitously expressed, temperature-sensitive form of the GAL4 inhibitor GAL80  
103 (*tub-GAL80<sup>ts</sup>*) by a temperature shift to 28.5°C at eclosion [9,35]. Staining AGs with a  
104 pan-EcR antibody that cross-reacts with all three characterised EcR isoforms [36]

105 revealed EcR expression in the nuclei of muscle cells, and SCs, which like MCs, are  
106 binucleate (Fig. 1B, C). This staining was lost in SCs expressing a previously  
107 characterised RNAi targeting transcripts for all EcR isoforms (Fig. 1D) [37].

108

109 **Figure 1. The EcR-B1 isoform of the Ecdysone Receptor is expressed in SC nuclei. A.**

110 Schematic of *Drosophila* male accessory glands and binucleate secondary and main  
111 cells within their monolayer epithelium. B-H. Images show distal tips of AGs  
112 dissected from 6-day-old males (except for mosaic in D). SCs (nuclei marked by red  
113 arrows) express nuclear GFP (which also labels SC cytosol) and other transgenes  
114 under *esg<sup>ts</sup>F/O* control. Nuclei are stained with DAPI (blue). B, C. Immunostaining  
115 with an antibody that cross-reacts with all EcR isoforms reveals expression in SC  
116 nuclei (B; red arrows) and in muscle cell nuclei (C; yellow arrows), but not in main  
117 cells (non-GFP-positive nuclei in B) in 6-day-old males. D-F. While expression of an  
118 RNAi targeting the EcR-A transcript does not affect EcR expression (F), mosaic  
119 expression of an RNAi targeting *EcR-B1* transcripts (E, green cells) or expression of an  
120 RNAi targeting all isoforms (D) obliterates nuclear EcR staining in SCs. Staining is still  
121 present in non-RNAi-expressing SCs, which are not labelled with GFP (E, blue  
122 arrows). G. *esg<sup>ts</sup>F/O*-driven expression of the EcR-B1 isoform has no detectable  
123 effect on nuclear EcR levels in SCs. Scale bars, 50  $\mu$ m.

124

---

125 We were unable to detect a robust signal in the AG with isoform-specific EcR-A and  
126 EcR-B1 antibodies. However, in an alternative approach, we expressed isoform-

127 specific RNAi constructs [38] in SCs under *esg<sup>ts</sup>F/O* control, either throughout  
128 adulthood, or by using a temperature-shift in 3-day-old males. The latter approach  
129 leads to maintained RNAi expression in only a subset of SCs [9]. *EcR-A*-RNAi did not  
130 affect EcR levels (Fig. 1F), but little, if any, EcR protein was detected in SCs expressing  
131 an *EcR-B1*-RNAi construct, demonstrating that EcR-B1 is the major isoform produced  
132 by these cells (Fig. 1E).

133

### 134 **The EcR promotes SC nuclear growth via hormone-dependent and –independent** 135 **mechanisms**

136 To test the roles of the EcR in adult SC growth, the pan-*EcR*-RNAi construct was  
137 expressed in these cells post-eclosion. As described previously, we assessed growth  
138 by measuring SC nuclear size in adult virgin males after 6 days relative to nuclear size  
139 in adjacent MCs, which do not grow with age or in response to mating, since this  
140 controls for nuclear size changes produced by flattening AGs upon mounting [9].

141 The growth of SC nuclei was inhibited by expression of *EcR*-RNAi (Fig 2A, B and F),  
142 but not by expression of a control RNAi targeting the *ry* gene (Fig. S1H). Steroid  
143 receptors typically modulate gene expression in the presence of their ligands, but in  
144 some contexts, it has been proposed that the unliganded EcR is repressive, and this  
145 repression is released by hormone [39]. To test whether ecdysone is required to  
146 induce EcR-dependent growth in SCs, we employed a temperature-sensitive allele of  
147 *ecdysoneless*, *ecd<sup>1</sup>* [25], a gene with pleiotropic effects on processes required for  
148 ecdysone synthesis and signalling in flies [40]. When males were shifted to the non-

149 permissive temperature (28.5<sup>0</sup>C) directly after eclosion, SCs and their nuclei failed to  
150 grow (Fig. 2E and F), mirroring the phenotype of *EcR* knockdown. This supports the  
151 hypothesis that ecdysone is required for normal *EcR*-dependent SC growth in virgin  
152 males.

153

154 **Figure 2. Ecdysone and the *EcR* are required to promote SC nuclear growth in virgin**  
155 **males.** A-E. Dissected accessory glands from 6-day-old virgin males were stained  
156 with an antibody against Fasciclin3 (*Fas3*) to mark the apical outlines of SCs and  
157 neighbouring MCs (yellow) and with DAPI (blue nuclei). Selected SC nuclei are  
158 marked with red arrows and in A-D express GFP and other transgenes under *esg*<sup>tsF/O</sup>  
159 control. A, B. RNAi knockdown of *EcR* expression in SCs with a pan-*EcR*-RNAi  
160 significantly restricts growth of SC nuclei (B) compared to control glands expressing  
161 GFP only (A). C. Overexpression of *EcR*-B1 in SCs has no effect on SC nuclear size. D.  
162 *EcR*-C overexpression promotes SC nuclear growth. E. The SC nuclei of the  
163 temperature-sensitive *ecd*<sup>1</sup> mutant are significantly smaller than control glands  
164 when adult virgin males are maintained at 28.5<sup>0</sup>C, which blocks *ecd* function. Mutant  
165 glands were co-stained with an antibody against the SC-specific secreted protein  
166 ANCE. F. Histogram showing size of SC nuclei relative to MC nuclei in *ecd*<sup>1</sup> mutant  
167 males and in AGs where SCs express different transgenes. Significance was assessed  
168 by two-way ANOVA. \*P<0.01, n>10. Scale bars, 50  $\mu$ m.

169

---



170 In several other cell types, the EcR functions as a heterodimer with the nuclear  
171 receptor Ultraspiracle (Usp) [41,42]. Usp can promote nuclear localisation of EcR in  
172 Chinese hamster ovary cells [43]. Staining with an antibody which recognises Usp  
173 [44] revealed that this protein is expressed in SC nuclei (Fig. S2H). However, *Usp*-  
174 RNAi knockdown in SCs had no effect on cell growth (Fig. S1 A, B and H) or EcR  
175 localisation and expression (Fig. S2A, B) in SCs, even though it strongly reduced Usp  
176 levels (Fig. S2I), suggesting that conventional EcR/Usp-mediated transcriptional  
177 regulation does not drive SC growth.

178 To test whether EcR and ecdysone signalling is also required for the additional  
179 growth of SC nuclei observed in multiply-mated males [9], we cultured individual  
180 newly eclosed males with 7-10 virgin females for six days, then analysed nuclear size.  
181 *EcR* knockdown strongly suppressed nuclear growth under these conditions,  
182 mirroring the effects of blocking BMP signalling by expressing the transcriptional  
183 repressor Dad (Fig. 3A) [13]. However, surprisingly, temperature-shifted *ecd<sup>1</sup>* males  
184 exhibited higher levels of SC growth after mating than mated controls (Fig. 3A-C).  
185 This suggests that unlike in virgin males, EcR-mediated growth in response to mating  
186 is primarily hormone-independent, and indeed, ecdysone blocks signalling under  
187 these conditions.

188

189 **Figure 3. Mating induces hormone-independent, EcR-regulated SC nuclear growth.**

190 A. Histogram showing SC nuclear size relative to adjacent MC nuclei in 6-day-old  
191 males for control glands, glands expressing EcR-RNAi, EcR-C or the BMP antagonist  
192 Dad in SCs under *esg<sup>ts</sup>F/O* control, and *ecd<sup>1</sup>* mutant glands. Mating induces nuclear

193 growth in control glands (eg. see B), which is suppressed when EcR and BMP  
194 signalling is reduced, but enhanced by the *ecd<sup>1</sup>* mutant (see C). B,B', C,C'. SC nuclei  
195 (marked by red arrows; stained with DAPI) in *ecd<sup>1</sup>* virgin males (C) are much smaller  
196 than controls (B), while SCs in mated *ecd<sup>1</sup>* glands (C') have increased nuclear growth.  
197 SCs from glands of 6-day-old males were identified by their characteristic  
198 morphology and their approximate outline is marked by a dashed circle. D.  
199 Histogram showing effects of RNAi-mediated knockdown of *cycE* and overexpression  
200 of *cycE* in SCs. Data in A and D analysed using one-way ANOVA and Tukey's multiple  
201 comparisons test; \*p<0.01, \*\*p<0.001, \*\*\*p<0.0001. n=15. Scale bars, 50  $\mu$ m.

202

---

203

204 **EcR protein levels are controlled post-transcriptionally by BMP signalling to**  
205 **regulate growth**

206 Since EcR-B1 is the major isoform expressed by SCs, we examined the effect of  
207 overexpressing it in these cells under *esg<sup>ts</sup>F/O* control. Unexpectedly, SC nuclear size  
208 was not affected either by this treatment (Fig. 2C, F), or by overexpression of EcR-A  
209 or EcR-B2 (Fig. S1D, F, H). However, when we analysed EcR protein levels in these  
210 backgrounds, they appeared unchanged compared to controls (Figs. 1G, S2A, D and  
211 F), even though these constructs increase EcR levels when expressed in adjacent  
212 MCs (Fig. S3A, C, E and G). Since many other UAS-coupled transgenes can be  
213 overexpressed in SCs under *esg<sup>ts</sup>F/O* control, our data suggest that EcR levels are

214 tightly controlled post-transcriptionally in these cells, so that increased *EcR*  
215 transcription has no obvious effect on receptor levels or growth.

216 Previous work has shown that SC growth is positively regulated by BMP signalling  
217 [9]. Since *EcR* signalling also promotes growth, we investigated the effect of BMP  
218 signalling on *EcR* protein expression. SC-specific expression of a constitutively active  
219 form of the Type I BMP receptor Thick veins ( $Tkv^{Q199D}$  or  $Tkv^{ACT}$ ) [45] induced  
220 increased levels of *EcR* protein, which was primarily localised in the nucleus (Fig. 4B).  
221 When BMP signalling was reduced in SC mosaics by inducing SC-specific knockdown  
222 of *Med*, encoding a downstream co-Smad transcription factor in the BMP signalling  
223 pathway, virtually no *EcR* protein was observed in knockdown cells (Fig. 4C). A  
224 similar BMP-dependent effect on *EcR* levels was not observed in main cells and main  
225 cell growth was also unaffected by  $Tkv^{ACT}$ , *EcR* or combined  $Tkv^{ACT}/EcR$  expression  
226 (Fig. S3). Taken together, these data indicate that BMP signalling is a key regulator of  
227 *EcR* protein levels specifically in SCs.

228

229 **Figure 4. BMP signalling regulates levels of the *EcR* protein in SCs.** Images show the  
230 AG epithelium dissected from 6-day-old virgin males expressing GFP and other  
231 transgenes under *esg<sup>tsF/O</sup>* control, and stained with a pan-*EcR* antibody. A, B.  
232 Upregulation of BMP signalling by SC-specific  $Tkv^{ACT}$  overexpression in adults results  
233 in increased expression of *EcR* (B) compared to control (A), with an enhanced  
234 nuclear signal (red arrows), and some cytosolic expression. C. RNAi knockdown of  
235 *Medea* in only some SCs, by activating the *esg<sup>tsF/O</sup>* driver system in 3-day-old adults,  
236 reduces BMP signalling in these cells and leads to a marked reduction in SC-specific

237 EcR expression (nuclei marked with red arrows) after a further 6 days. EcR  
238 expression in SCs that do not express the RNAi construct is normal (white arrows).  
239 Scale bars, 50  $\mu$ m.

240

---

241 To analyse the interaction between BMP and EcR signalling further, we next tested  
242 whether overexpressing EcR when BMP signalling is hyper-activated might further  
243 increase EcR protein levels and promote growth. Co-overexpression of Tkv<sup>ACT</sup> and  
244 EcR-B1 in SCs resulted in a strong synergistic enhancement of growth (Figs. 5A-D, H).  
245 Similar synergistic growth effects were observed with both EcR-A and EcR-B2, even  
246 though overexpressing either EcR isoform in the absence of Tkv<sup>ACT</sup> had no effect on  
247 nuclear size (Fig. S1A, C-H).

248

249 **Figure 5. BMP signalling and the EcR synergise to regulate SC growth.** Dissected AGs  
250 from 6-day-old virgin males expressing GFP and other transgenes under *esg*<sup>tsF/O</sup>  
251 control were stained with an antibody against Fas3 to mark the apical outlines of SCs  
252 and neighbouring MCs (yellow) and DAPI (blue nuclei). A-C. The nuclear growth  
253 induced by SC-specific expression of Tkv<sup>ACT</sup> (B) is completely suppressed by co-  
254 expression of EcR-RNAi (C) to levels comparable with controls (A). D-G. Co-  
255 expression of Tkv<sup>ACT</sup> (to upregulate BMP signalling) and EcR-B1 (E) or EcR-C (G)  
256 produces a synergistic enhancement of nuclear (and cell) growth in 6-day-old adults  
257 relative to the effects of Tkv<sup>ACT</sup> (B), EcR-B1 (D) or EcR-C (F) alone. Note that some  
258 main cells are compressed between the giant co-expressing SCs. H. Histogram

259 showing size of SC nuclei relative to MC nuclei in AGs where SCs are expressing Tkv  
260 and EcR transgenes. Selected SC nuclei are marked with red arrows. Data analysed  
261 using one-way ANOVA and Tukey's multiple comparisons test \* $p < 0.02$ , \*\*\* $p < 0.0001$ .  
262  $n = 15$  Scale bars, 50  $\mu\text{m}$ .

263

---

264 In addition to these dramatic growth effects, very high levels of EcR expression were  
265 observed in SCs co-expressing Tkv<sup>ACT</sup> and any of the EcR isoforms (Fig. 6A-D and S2A,  
266 D-G). The highest EcR levels were observed in nuclei, but all co-expressing cells also  
267 had detectable cytosolic EcR, which was highly elevated in some cells (Fig. 6D and F,  
268 S2E and G). We conclude that BMP signalling primarily controls the levels of EcR  
269 protein expression post-transcriptionally in SCs.

270

271 **Figure 6. BMP signalling regulates EcR levels post-transcriptionally in SCs, probably**  
272 **via the EcR N-terminal domain.** Dissected AGs from 6-day-old virgin males  
273 expressing GFP and other transgenes under  $esg^{\text{tsF/O}}$  control were stained with a  
274 pan-EcR antibody (red arrows) and DAPI (blue nuclei). A, B. Nuclear EcR levels in SCs  
275 are elevated when BMP signalling is increased upon expression of Tkv<sup>ACT</sup> in SCs (B)  
276 compared to controls (A). C, D. Nuclear EcR levels are unaffected by overexpression  
277 of EcR-B1 alone (C), but levels of nuclear protein are highly upregulated when co-  
278 expressed with Tkv<sup>ACT</sup> (D). Some cytosolic EcR is also present. E, F. By contrast,  
279 overexpression of the N-terminally truncated EcR protein, EcR-C, leads to

280 accumulation of nuclear and cytosolic EcR (E). Co-expression with  $Tkv^{ACT}$  appears to  
281 increase the ratio of nuclear to cytosolic EcR in some cells (F). Scale bars = 50  $\mu$ m.

282

---

283 In light of this strong dependence of growth-regulatory EcR protein levels on BMP  
284 signalling, we tested whether BMP-dependent growth in SCs is mediated through  
285 EcR signalling by co-expressing  $Tkv^{ACT}$  with pan-*EcR*-RNAi.  $Tkv^{ACT}$ -induced growth was  
286 strongly suppressed, and the resulting SC nuclei were not significantly different in  
287 size from wild type controls (Fig. 5A, B, G and H), indicating that BMP-dependent SC  
288 growth requires the presence of the EcR.

289

290 **The unique AF1-containing N-terminal domain of each EcR protein isoform appears**  
291 **to be involved in its SC-specific post-transcriptional regulation by BMPs**

292 Previous *in vitro* studies have revealed that when the *Drosophila* EcR-A and EcR-B1  
293 isoforms are expressed in Chinese Hamster Ovary (CHO) cells, the different N-  
294 terminal domains (NTD) of these proteins, which include the AF1 domain, one of the  
295 two transcriptional activation domains in these receptors, partially destabilise the  
296 proteins through a ubiquitination-dependent mechanism [46]. Although these  
297 experiments were performed in a heterologous system and did not reveal similar  
298 regulation for the EcR-B2 isoform, which has a much shorter AF1 domain, we tested  
299 whether the NTD plays a role in SC-specific, BMP-dependent control of EcR protein  
300 levels. We expressed EcR-C, an artificial isoform of the protein in which the NTD  
301 sequence has been deleted, in SCs. This protein only contains sequences common to

302 all isoforms [47] and in other cell types it usually has reduced activity compared to  
303 native forms of EcR when overexpressed.

304 Unlike the endogenously expressed isoforms of EcR, overexpression of EcR-C  
305 promoted growth of SCs (Fig. 2D, F) and produced high levels of EcR protein in the  
306 nuclei and cytosol of SCs when expressed alone (Fig. 6E). The most likely explanation  
307 of our data, given the known role of EcR NTD sequences in protein stability [46], is  
308 that BMP signalling activity regulates levels of different EcR isoforms via a genetic  
309 interaction with each of their unique NTDs. The growth effects of EcR-C were further  
310 enhanced by co-expression with  $Tkv^{ACT}$  in virgin males (Fig. 5F and H), indicating that  
311 BMP signalling affects EcR activity via more than one mechanism. Indeed, relative  
312 levels of nuclear versus cytosolic EcR-C appeared to be increased by  $Tkv^{ACT}$   
313 overexpression in many, but not all, SCs, suggesting that BMP signalling might also  
314 regulate the nuclear trafficking of EcR (Fig. 6F). When males, which are  
315 overexpressing EcR-C in SCs, were mated, some additional SC growth was observed  
316 compared to virgins (Fig. 3A), perhaps because of the associated increase in BMP  
317 signalling.

318 A post-transcriptional interaction between the EcR and BMP signalling pathways has  
319 not previously been reported in *Drosophila*. It was not observed in main cells (Fig.  
320 S3I, J). We conclude that BMP signalling controls EcR levels and EcR signalling in SCs  
321 post-transcriptionally via a cell type-specific interaction that appears to partly  
322 involve the EcR NTD.

323

324 **Mating drives synthesis of new DNA in SCs, which is regulated by BMP-dependent,**  
325 **but hormone-independent, EcR signalling**

326 In *Drosophila*, increased nuclear and cell size is often associated with  
327 endoreplication, which increases gene expression through elevated gene copy  
328 number [48]. At eclosion, both SCs and MCs have two large nuclei, each estimated to  
329 be tetraploid [49]. Previously we were unable to detect endoreplication in adult SCs  
330 of mated flies fed with the nucleotide analogue bromodeoxyuridine (BrdU) [9].  
331 However, we reasoned that this might be explained by poor penetration of the anti-  
332 BrdU antibody in AGs, and therefore repeated these experiments by feeding males  
333 with 5-ethynyl-2'-deoxyuridine (EdU), which can be detected chemically, throughout  
334 adulthood. While EdU uptake was rarely observed in SCs of 6-day-old virgin males,  
335 approximately 25% of SCs from multiply-mated males incorporated EdU, indicating  
336 that new DNA synthesis was occurring in a subset of these cells (Fig 7A, B and G). No  
337 new DNA synthesis was observed in the MCs of either virgin or mated glands (Fig 7A  
338 and B).

339

340 **Figure 7. Hormone-independent, EcR-mediated endoreplication of SC DNA is**  
341 **stimulated by mating.** Males expressing GFP and other transgenes under *esg*<sup>tsF/O</sup>  
342 control or *ecd*<sup>1</sup> mutants were cultured on EdU-containing food post-eclosion,  
343 dissected at 6 days, and their AGs probed for EdU uptake to assess DNA replication  
344 and stained with DAPI. A, B. EdU was incorporated in about 30% of SCs after mating  
345 (B; white arrows depict SC with EdU uptake), but not in virgins (A). Inset in B shows  
346 high magnification view of single SC. C. SC-specific expression of EcR-RNAi blocks



347 EdU incorporation in mated males. D, E. Expression of EcR-C (D) or Tkv<sup>ACT</sup> (E) in SCs  
348 promotes EdU incorporation in SCs from virgin males. F. Almost all SCs in *ecd<sup>1</sup>* males  
349 incorporate EdU in their nuclei after mating. G. Dad-expressing SCs do not  
350 incorporate EdU after mating (note weak GFP expression in these cells is masked  
351 following the EdU staining procedure). H. Histogram showing EdU incorporation into  
352 SC nuclei in different genetic backgrounds. I. Histogram showing SC:MC nuclear size  
353 ratio for EdU-positive and -negative SCs from *esg<sup>ts</sup>F/O* control mated males. One-  
354 way ANOVA, Dunnett's multiple comparisons test. \* $p < 0.0001$ ,  $n = 15$ . Scale bars, 70  
355  $\mu\text{m}$ .

356 \_\_\_\_\_

357 Interestingly, SC nuclei that take up EdU in mated glands were larger than the EdU-  
358 negative nuclei (Fig 7H), demonstrating that part of the increase in SC nuclear size is  
359 a consequence of new DNA synthesis. Furthermore, EdU incorporation was  
360 distributed across all parts of the nucleus (Fig 7B'), suggesting that it is not the result  
361 of focal gene amplification, as is seen for chorion genes in ovarian follicle cell nuclei  
362 [50]. To further assess whether genome endoreplication is responsible for mating-  
363 dependent growth, we tested the effect of overexpressing and knocking down the  
364 G1/S cyclin, Cyclin E (*CycE*) in SCs, which is required for endoreplication in other  
365 *Drosophila* cell types [48]. While knockdown of *cycE* had no significant effect on  
366 nuclear growth in virgin males, it inhibited the additional growth in mated males  
367 (Fig. 3D). Furthermore, overexpression of *CycE* in virgin males stimulated nuclear  
368 growth, but this was not enhanced by mating (Fig 3D). Consistent with these  
369 findings, studies of endoreplication in the salivary gland have suggested that

370 constant overexpression of CycE can drive one cycle of endoreplication, but does not  
371 permit further rounds [51].

372 Given that both BMP and EcR signalling modulate SC nuclear growth in mated males,  
373 we tested whether these pathways regulate DNA synthesis in adult SCs. In complete  
374 contrast to controls, the majority of SCs expressing  $Tkv^{ACT}$  in adult virgin males  
375 typically incorporated EdU over 6 days (Fig 7F and G). Furthermore, all SCs  
376 expressing the EcR-C construct contained nuclear EdU (Fig 7E and G). EdU uptake  
377 was significantly suppressed in glands from multiply-mated males expressing EcR-  
378 RNAi or the BMP antagonist Dad in SCs (Fig 7D, G and H).

379 Finally, the number of SCs incorporating EdU in *ecd<sup>1</sup>* males shifted to the non-  
380 permissive temperature after eclosion was assessed. This genetic manipulation had  
381 no effect on EdU incorporation in virgin males. By contrast, incorporation in  
382 multiply-mated males was significantly increased compared to controls, with positive  
383 staining in virtually all SCs, demonstrating that mating-induced, EcR-mediated  
384 endoreplication is not hormone-dependent, and indeed, may be partially inhibited  
385 by ecdysone (Fig. 7C and G). Taken together, these data indicate that both BMP and  
386 EcR signalling act in SCs of mated males to promote synthesis of new DNA. This  
387 endoreplication explains much of the additional nuclear growth in SCs after mating  
388 (Fig. 3A), but unlike growth in virgin males, this process is ecdysone-independent.

389

390 **Discussion**

391 Secretory cells in both the mammalian prostate and the fly accessory gland have  
392 unusual growth properties in adults. Androgens play a central role in regulating  
393 growth and proliferation in the prostate, potentially linking nutrition and sexual  
394 activity to adult glandular activity [22,23], as well as driving maturation during  
395 puberty. In advanced prostate cancer, when tumour cells can become resistant to  
396 anti-androgen treatment, they frequently grow via a hormone-independent,  
397 androgen receptor-driven process that remains incompletely understood [24].

398 Here we demonstrate that SC nuclear growth in virgin male flies also involves  
399 hormone-dependent steroid receptor activity. This activity is modulated by local  
400 autocrine BMP signals via a novel post-transcriptional mechanism. After mating, EcR-  
401 dependent nuclear growth becomes primarily hormone-independent and requires  
402 CycE-driven endoreplication. As we discuss below, these regulatory mechanisms  
403 potentially allow SC growth and secretion to adapt to socio-sexual experience and  
404 mating.

405

#### 406 **BMP signalling tightly regulates EcR levels to control SC growth**

407 Our findings that BMP signalling is required in SCs for them to express detectable  
408 levels of a specific EcR isoform, EcR-B1, and that knocking down EcR expression  
409 blocks BMP-stimulated growth, strongly indicate that EcR signalling is a primary  
410 mediator of BMP-dependent growth regulatory effects in these cells.

411 The BMP/EcR post-transcriptional interaction appears highly cell type-specific in  
412 flies. It cannot be induced in main cells of the AG and has not been reported in

413 multiple tissue types during *Drosophila* development. Signalling by Activins,  
414 members of another class of TGF- $\beta$  ligands, is required for EcR-B1 expression during  
415 neuronal remodelling of the fly brain at metamorphosis [52]. However, the effects of  
416 losing the Type I Activin receptor Baboon can be overcome by GAL4/UAS-driven  
417 expression of EcR-B1, suggesting that SC-like post-transcriptional control of EcR-B1 is  
418 not involved [52]. Regulation of EcR-B1 expression by TGF- $\beta$ /BMP signalling has also  
419 been reported in larval motoneurons as they dismantle during metamorphosis, but  
420 again post-transcriptional control has not been implicated [53].

421 Each of the three normal isoforms of EcR has a unique N-terminal domain, which  
422 includes a so-called AF1 transcriptional activation domain. The sequences encoding  
423 these NTDs appear to be essential for normal BMP-dependent regulation of EcR  
424 levels in SCs, because their absence in the EcR-C protein leads to partial evasion of  
425 this control. The transcript sequences encoding the normal EcR isoforms and EcR-C  
426 are all identical except in the 5' regions that encode the isoform-specific N-terminal  
427 domains. It is possible that these different 5' sequences are all independently  
428 targeted by a mechanism that mediates BMP-dependent control of EcR protein  
429 levels, but cannot affect EcR-C. However, it seems much more likely that the  
430 regulation is post-translational, particularly since the NTDs of both EcR-A and EcR-B1  
431 are involved in degradative mechanisms that control EcR protein levels [46].

432

433 **Hormone-independent non-canonical EcR signalling in SCs is activated by mating**  
434 **and specifically regulates endoreplication**

435 Not only is the EcR regulated via a unique post-transcriptional mechanism in SCs, it  
436 also has an unusual and complex mode of action and target specificity. Although  
437 Usp, the well-characterised binding partner of EcR during development, is expressed  
438 selectively in the nuclei of SCs, *Usp* knockdown does not alter SC nuclear size or EcR  
439 localisation. Usp-independent EcR signalling has been reported previously in one  
440 developmental scenario in larvae [54]; the mechanisms involved have not been  
441 characterised, although the authors propose that the EcR may act as a homodimer  
442 or bind with an alternative partner. Furthermore, recent work has shown that EcR  
443 expression is functionally important in development of the adult AG epithelium, but  
444 does not require Usp [34]. These authors did not identify the cells involved or the  
445 precise cellular defects.

446 We have screened for expression of several of the known target genes of EcR in  
447 development, such as *Broad* and *Eip74EF*, using well-characterised antibodies [55]  
448 and specific gene traps, but have not been able to identify any downstream targets  
449 of the EcR in SCs. Cell type-specific analysis of genomic EcR binding sites or the SC  
450 transcriptome will be required to unravel the genetic programme controlled by this  
451 receptor in these cells.

452 The other unique feature of EcR signalling in SCs is that mating alters its downstream  
453 effects. EcR-regulated nuclear and cell growth in virgins occurs independently of  
454 DNA replication, the former potentially reflecting decondensation of chromatin. But  
455 after mating, a subset of cells activates EcR-dependent endoreplication. This is  
456 responsible for much of the additional SC growth observed after mating, because the  
457 nuclei of these cells are larger and *cycE* knockdown specifically suppresses mating-

458 dependent growth. The changes can be phenocopied in virgin males by activation of  
459 BMP signalling or overexpression of EcR-C in SCs. Most importantly, this EcR-  
460 regulated effect is hormone-independent, unlike growth in SCs of virgins.  
461 Remarkably, in most AGs from mated *ecd<sup>1</sup>* males, the majority of SCs endoreplicate  
462 their genomes, suggesting ecdysone normally suppresses this process. In this  
463 context, the EcR could either be acting as a repressor of gene transcription, whose  
464 repression is released by ecdysone [39], or it may only bind to the targets, which it  
465 activates, in the absence of ligand. Analysis of mating-specific, EcR genomic binding  
466 sites will be required to distinguish these two hypotheses.

467 Hyper-activated BMP signalling may be an important trigger for endoreplication  
468 after mating. We have previously shown that only about 30% of SCs increase BMP  
469 signalling detectably following copulation [13], mirroring the proportion of  
470 endoreplicating cells under these conditions. However, we have yet to develop a  
471 robust protocol with which we can co-detect EdU and the BMP transcriptional  
472 target, P-Mad, to confirm that these two populations are the same. Furthermore,  
473 since genetically activating BMP signalling in SCs does not induce endoreplication in  
474 all cells, there is probably a second, as yet unidentified, mechanism that modulates  
475 the number of endoreplicating cells.

476

477 **The EcR provides a link between adult socio-sexual behaviour and accessory gland**  
478 **function**

479 Other studies have shown that whole animal 20-hydroxyecdysone (20-HE) titres  
480 increase in male flies exposed to previously mated females [27] and that EcR  
481 signalling activity in the fly brain is required for normal courtship behaviours [27,29].  
482 Furthermore, application of topical 20E to males exposed to females, which have an  
483 experimentally sealed ovipositor that prevents mating, rescues the reduction in AG  
484 secretory activity exhibited by these animals [33], strongly suggesting that the  
485 overall activity of the gland can be influenced by this hormone.

486 We propose that direct effects of ecdysone on SCs, cells which have an important  
487 role in AG reproductive function [9-11] and can affect the normal processing of main  
488 cell products like Ovulin [11], provide one route by which this hormone can alter the  
489 activity of the entire gland. Indeed, Sitnik et al [56] have presented evidence that  
490 blocking the normal development of SCs in a specific *Abd-B* mutant may have  
491 indirect effects on the transcriptional programme of MCs, further supporting the  
492 idea that SCs can co-ordinate functions of both epithelial cell types in the AG.

493 After mating, EcR-mediated growth of some SCs becomes hormone-independent  
494 and involves endoreplication. Endoreplication is employed to promote high levels of  
495 transcriptional activity and secretion in a range of organisms from mammals to  
496 plants [48], for example in the salivary glands and follicle cells of the egg chamber in  
497 *Drosophila*. New DNA synthesis in SCs is therefore likely to boost transcription in  
498 this highly specialised, secretory cell type to replenish SC products released from the  
499 AG during mating, in preparation for subsequent matings.

500 Such regulation has important physiological implications. Ecdysone levels and SC  
501 growth are reduced in virgin males, particularly in the absence of females [27], thus

502 conserving resources. The hormone-independent endoreplication mechanism allows  
503 such flies to rapidly upregulate SC activity following mating, using the EcR (Figure 8).  
504 Indeed, since *ecd<sup>1</sup>* mutant males exhibit an enhanced level of endoreplication after  
505 mating, virgin males with the lowest ecdysone levels and therefore the least SC  
506 growth, could respond particularly strongly to these post-mating, hormone-  
507 independent signals.

508

509 **Figure 8.** Proposed model explaining physiological basis of hormone-dependent and  
510 -independent, EcR-mediated SC growth. Our data reveal that EcR-dependent growth  
511 of SCs is differentially modulated by the presence of ecdysone (E), according to  
512 mating status. An E-EcR complex, which does not require Usp, appears to be  
513 necessary for normal SC nuclear growth observed in virgin males. This form of  
514 growth does not involve endoreplication. Growth is restricted in virgin males with  
515 low E titres, whilst virgin males with higher E titres, such as those in contact with  
516 pre-mated females, should have larger SCs and presumably more biosynthetic and  
517 secretory activity. In mated males, SC growth is enhanced, at least in part due to new  
518 DNA synthesis. Growth and the proportion of SCs that endoreplicate their genome is  
519 greatly enhanced in mated *ecd<sup>1</sup>* males, but suppressed in *EcR*-RNAi-expressing SCs,  
520 indicating that mating-induced growth and endoreplication occurs via a hormone-  
521 independent, EcR-mediated mechanism. This is stimulated by elevated BMP  
522 signalling induced by autocrine BMP ligand Dpp through the heterodimeric Tkv/Wit  
523 receptor, which appears to stabilise EcR [13]. In mated males, EcR that is not bound  
524 to E must either repress or activate a subset of genes that are not EcR targets in



525 virgin males, hence inducing endoreplication, and this is suppressed by E. Direct or  
526 indirect targets include cell cycle regulators like *cycE*. In mated males with no  
527 ecdysone, more SCs switch to endoreplication-dependent growth. This mechanism  
528 permits small SCs from males with low E levels (for example, because they have  
529 been isolated from females) to grow more rapidly in response to mating, when  
530 compared to SCs from males with higher E titres, which are already enlarged in  
531 virgins.

532

---

533 **Growth in both the prostate cells and the fly secondary cells is regulated by BMPs**  
534 **and different forms of steroid receptor signalling**

535 We initially tested the function of EcR signalling in SCs because of the critical role of  
536 androgens and AR signalling in normal and tumorigenic prostate epithelial growth.  
537 We have uncovered a clear parallel between humans and flies: the receptor for a  
538 steroid hormone, which is regulated by socio-sexual experience and environment, is  
539 involved in controlling growth of secretory cells in both male glands, and can  
540 function by hormone-dependent and –independent mechanisms. In flies, this switch  
541 plays a physiological role, while in prostate, it has only been observed to date in  
542 cancer.

543 Like steroids, BMP signalling has also been implicated in prostate growth and  
544 metastasis [15-17]. However, its effects are complex, because different BMP ligands,  
545 which signal through alternative pathways, can have opposite effects. In prostate  
546 cancer, BMP signalling has been implicated in the androgen-independent AR  
547 signalling associated with castration resistance [57-59], though its mode of action

548 remains unclear. Our findings suggest links between BMPs and steroid receptors in  
549 the male reproductive system of the fly that switch the EcR to a hormone-  
550 independent mode under physiological conditions. The parallels in the mechanisms  
551 involved now require further investigation in both flies and humans with particular  
552 focus on defining the cellular conditions under which BMP-induced, hormone-  
553 independent signalling is activated.

554

## 555 **Materials and Methods**

### 556 **Fly strains and culture**

557 The following fly strains (obtained from the Bloomington Stock Centre, except where  
558 noted) were employed: *esg<sup>tsF/O</sup>* (*w*; *esg-GAL4*, *UAS-GFPnls*; *act>CD2>GAL4*, *UAS-FLP*;  
559 gift from B. Edgar) [35], *UAS-EcR-RNAi* (TRiP.JF02538) [60], *UAS-EcR-B1*, *UAS-EcR-A*,  
560 *UAS-EcR-B2*, *UAS-EcR-C* [47,61], *UAS-EcR-B1-RNAi*, *UAS-EcR-A-RNAi* [38], *UAS-*  
561 *Tkv<sup>Q199D</sup>* [45], *UAS-Med-RNAi* [62], *UAS-Usp-RNAi* (TRiP.JF02546), *UAS-ry-RNAi*  
562 (TRiP.44106), and *Acp26Aa-GAL4* (gift from S. Goodwin; [63]. TRiP UAS-RNAi lines  
563 are described in [64]. Flies were fed on standard cornmeal agar medium. No dried  
564 yeast was added to the vials.

### 565 **Fly Genetics**

566 To express UAS-transgenes in adult SCs under *esg<sup>tsF/O</sup>* control [9], fly crosses were  
567 initially cultured at a non-permissive temperature, 18<sup>0</sup>C or 25<sup>0</sup>C (*w<sup>1118</sup>* and *UAS-ry-*  
568 *RNAi* flies were used in control crosses with the *esg<sup>tsF/O</sup>* strain). Newly eclosed,  
569 virgin males of the appropriate genotype were selected, separated from females and

570 transferred to 28.5<sup>0</sup>C immediately. All SCs that induce FLP-mediated recombination  
571 of the *act>CD2>GAL4* construct continue to express GFP. Mosaic experiments were  
572 performed by delaying the temperature shift until day 3 of adult life, with dissection  
573 of adults at approximately 9 days post-eclosion [9]. Expression of *esg-GAL4* is  
574 gradually lost in some adult SCs, so delaying the temperature shift results in  
575 *act>CD2>GAL4* recombination in a subset of SCs. For nuclear size measurements and  
576 growth analysis, males were typically dissected at 6 days.

### 577 **Immunohistochemistry and imaging**

578 This followed previously published methods [9,14]. Flies were anaesthetised using  
579 CO<sub>2</sub> and dissected with fine forceps in 4% paraformaldehyde dissolved in PBS.  
580 Dissected AGs were transferred to Eppendorf tubes, fixed for 20 min at 22<sup>0</sup>C and  
581 then washed 6 x 10 min in 1 ml PBST [1 x PBS, 0.3% Triton X-100 (Sigma-Aldrich)].  
582 Anti-Fas3 [65], anti-pan-EcR, anti-EcR-A, and anti-EcR-B1 [36] antibodies were all  
583 obtained as supernatants from the Developmental Studies Hybridoma Bank, Iowa  
584 and diluted 1 in 10 in PBSTG (PBST, 10% goat serum). Mouse anti-Usp antibody  
585 (1:100 dilution) was a kind gift from the Kafatos lab [44] and the rabbit anti-ANCE  
586 antibody (1 in 200) was kindly provided by E. Isaac [66]. Glands were incubated  
587 overnight at 4<sup>0</sup>C in primary antibody. They were then washed for 6 x 10 min in PBST  
588 before incubation with either Cy3- or Cy5-conjugated donkey anti-mouse secondary  
589 antibody (Jackson laboratories) used at a dilution of 1 in 400 for 2 hours at room  
590 temperature. Glands were further washed in PBST for 6 x 10 min, before mounting  
591 on slides using DAPI-containing Vectashield (Vector Laboratories). Imaging of glands  
592 was performed using a Zeiss Axioplan 2 scanning confocal microscope with a LSM510

593 laser module or a Zeiss 880 Airyscan system. Nuclear areas were measured using  
594 Axiovision freeware (Zeiss) as previously described (Leiblich et al., 2012).

#### 595 **Detection of DNA replication using EdU**

596 To detect DNA replication using the thymidine analogue, 5-ethynyl-2'-deoxyuridine  
597 (EdU), a Click-iT<sup>®</sup> EdU imaging kit (Invitrogen) was used [67]. Adult flies were  
598 maintained on medium containing 0.2 mM EdU (ThermoFisher) from eclosion until  
599 dissection at 6 days. The EdU-containing medium was prepared by mixing standard  
600 yeast-cornmeal agar medium with a 10 mM stock solution (diluted in PBS, per  
601 manufacturer's instruction). To detect EdU incorporation, dissected AGs were fixed  
602 in paraformaldehyde and processed as for immunohistochemistry. The Click-iT<sup>®</sup>  
603 reaction mix was prepared following the manufacturer's instructions, using a 1:400  
604 dilution of 2mM stock of azide-fluor 555 (Sigma Aldrich) dissolved in DMSO. To label  
605 DNA in the sample, 200  $\mu$ l of the reaction mix was added to the vials and left to  
606 incubate for 30 minutes at 20°C, away from light. Glands were washed three times in  
607 200  $\mu$ l PBST and then resuspended in 200  $\mu$ l PBS, before mounting on coverslips  
608 using DAPI-containing mounting medium.

#### 609 **Statistical analyses**

610 We compared the mean SC:MC nuclear area across genotypes and controls. Having  
611 confirmed the data were normally distributed by the Shapiro-Wilk test, we used one-  
612 way analysis of variance (ANOVA) and Tukey's multiple-comparison post-test to  
613 identify significant changes. Differences were deemed significant at a P value of  
614 <0.05. Statistical analyses were performed using GraphPad Prism 7.0, GraphPad

615 Software, La Jolle California USA, [www.graphpad.com](http://www.graphpad.com). Identical statistical analyses  
616 were performed to compare the mean proportion of SCs incorporating EdU across  
617 genotypes with control glands.

618

### 619 **Acknowledgements**

620 We thank Elwyn Isaac, Fotis Kefatos, Bruce Edgar, and Stephen Goodwin for stocks  
621 and reagents; we are grateful to the Bloomington *Drosophila* Stock Center for flies  
622 and to the Developmental Studies Hybridoma Bank (DSHB), Iowa for antibodies.  
623 Some microscopy was undertaken in the Micron Oxford Advanced Bioimaging Unit.

624

### 625 **Author contributions**

626 AL, JEH, AS, DCIG, FCH, and CW conceptualised and planned experiments; AL, JEEUH,  
627 AS, CG, SR, SMW, and PM performed experiments; AL, JEH, AS, and CW analysed and  
628 evaluated the data; AL and CW wrote the manuscript; all authors read the  
629 manuscript.

630

### 631 **Conflicts of interest**

632

633 The authors declare that they have no conflict of interest

634

635 **References**

- 636 1. Mann T, Lutwak-Mann C (1951) Secretory function of male accessory organs of  
637 reproduction in mammals. *Physiological Reviews* 31: 27-55
- 638 2. Robertson SA, Sharkey DJ (2016) Seminal fluid and fertility in women. *Fertility and Sterility*  
639 106: 511-9
- 640 3. Chapman T, Liddle LF, Kalb JM, Wolfner MF, Partridge L (1995) Cost of mating in  
641 *Drosophila melanogaster* females is mediated by male accessory gland products. *Nature*  
642 373: 241-4
- 643 4. Wolfner MF (1997) Tokens of love: functions and regulation of *Drosophila* male accessory  
644 gland products. *Insect Biochem Molec* 27: 179-92
- 645 5. Wolfner MF (2007) "S.P.E.R.M." (seminal proteins (are) essential reproductive  
646 modulators): the view from *Drosophila*. *Society of Reproduction and Fertility supplement* 65:  
647 183-99
- 648 6. Wilson C, Leiblich A, Goberdhan DC, Hamdy F (2017) The *Drosophila* accessory gland as a  
649 model for prostate cancer and other pathologies. *Current Topics Dev Biol* 121: 339-375
- 650 7. Kubli E (2003) Sex-peptides: seminal peptides of the *Drosophila* male. *Cell Mol Life Sci* 60:  
651 1689-704
- 652 8. Sirot LK, LaFlamme BA, Sitnik JL, Rubinstein CD, Avila FW, Chow CY, Wolfner MF (2009)  
653 Molecular social interactions: *Drosophila melanogaster* seminal fluid proteins as a case  
654 study. *Advances in genetics* 68: 23-56
- 655 9. Leiblich A, Marsden L, Gandy C, Corrigan L, Jenkins R, Hamdy F, Wilson C (2012) Bone  
656 morphogenetic protein- and mating-dependent secretory cell growth and migration in the  
657 *Drosophila* accessory gland. *Proc Natl Acad Sci U S A* 109: 19292-7

- 658 10. Minami R, Wakabayashi M, Sugimori S, Taniguchi K, Kokuryo A, Imano T, Adachi-Yamada  
659 T, Watanabe N, Nakagoshi H (2012) The homeodomain protein defective proventriculus is  
660 essential for male accessory gland development to enhance fecundity in *Drosophila*. PLoS  
661 One 7: e32302
- 662 11. Gligorov D, Sitnik JL, Maeda RK, Wolfner MF, Karch F (2013) A novel function for the Hox  
663 gene *Abd-B* in the male accessory gland regulates the long-term female post-mating  
664 response in *Drosophila*. PLoS Genetics 9: e1003395
- 665 12. Timms BG, Hofkamp LE (2011) Prostate development and growth in benign prostatic  
666 hyperplasia. Differentiation 82: 173-83
- 667 13. Redhai S, Hellberg JE, Wainwright M, Perera SW, Castellanos F, Kroeger B, Gandy C,  
668 Leiblich A, Corrigan L, Hilton T, Patel B, Fan SJ, Hamdy F, Goberdhan DC, Wilson C (2016)  
669 Regulation of dense-core granule replenishment by autocrine BMP signalling in *Drosophila*  
670 secondary cells. PLoS Genetics 12: e1006366
- 671 14. Corrigan L, Redhai S, Leiblich A, Fan SJ, Perera SM, Patel R, Gandy C, Wainwright SM,  
672 Morris JF, Hamdy F, Goberdhan DC, Wilson C (2014) BMP-regulated exosomes from  
673 *Drosophila* male reproductive glands reprogram female behavior. J Cell Biol 206: 671-88
- 674 15. Mehta V, Schmitz CT, Keil KP, Joshi PS, Abler LL, Lin TM, Taketo MM, Sun X, Vezina CM  
675 (2013) Beta-catenin (CTNNB1) induces BMP expression in urogenital sinus epithelium and  
676 participates in prostatic bud initiation and patterning. Dev Biol 376: 125-35
- 677 16. Dai J, Keller J, Zhang J, Lu Y, Yao Z, Keller ET (2005) Bone morphogenetic protein-6  
678 promotes osteoblastic prostate cancer bone metastases through a dual mechanism. Cancer  
679 Res 65: 8274-85

- 680 17. Lee YC, Cheng CJ, Bilen MA, Lu JF, Satcher RL, Yu-Lee LY, Gallick GE, Maity SN, Lin SH  
681 (2011) BMP4 promotes prostate tumor growth in bone through osteogenesis. *Cancer Res*  
682 71: 5194-203
- 683 18. Cunha GR, Ricke W, Thomson A, Marker PC, Risbridger G, Hayward SW, Wang YZ,  
684 Donjacour AA, Kurita T (2004) Hormonal, cellular, and molecular regulation of normal and  
685 neoplastic prostatic development. *Journal Steroid Biochem Mol Biol* 92: 221-36
- 686 19. Wen S, Chang HC, Tian J, Shang Z, Niu Y, Chang C (2015) Stromal androgen receptor roles  
687 in the development of normal prostate, benign prostate hyperplasia, and prostate cancer.  
688 *Am J Pathol* 185: 293-301
- 689 20. La Vignera S, Condorelli RA, Russo GI, Morgia G, Calogero AE (2016) Endocrine control of  
690 benign prostatic hyperplasia. *Andrology* 4: 404-11
- 691 21. Zhou Y, Bolton EC, Jones JO (2015) Androgens and androgen receptor signaling in  
692 prostate tumorigenesis. *J Mol Endocrinol* 54: R15-29
- 693 22. Alvarado LC (2013) Do evolutionary life-history trade-offs influence prostate cancer risk?  
694 a review of population variation in testosterone levels and prostate cancer disparities. *Evol*  
695 *Appl* 6: 117-33
- 696 23. Jannini EA, Fisher WA, Bitzer J, McMahon CG (2009) Is sex just fun? How sexual activity  
697 improves health. *J Sex Med* 6: 2640-8
- 698 24. Tilki D, Schaeffer EM, Evans CP (2016) Understanding mechanisms of resistance in  
699 metastatic castration-resistant prostate cancer: the role of the androgen receptor. *Eur Urol*  
700 *Focus* 2: 499-505
- 701 25. Garen A, Kauvar L, Lepesant JA (1977) Roles of ecdysone in *Drosophila* development.  
702 *Proc Natl Acad Sci U S A* 74: 5099-103



- 703 26. Yamanaka N, Rewitz KF, O'Connor MB (2013) Ecdysone control of developmental  
704 transitions: lessons from *Drosophila* research. *Ann Rev Entomol* 58: 497-516
- 705 27. Ishimoto H, Sakai T, Kitamoto T (2009) Ecdysone signaling regulates the formation of  
706 long-term courtship memory in adult *Drosophila melanogaster*. *Proc Natl Acad Sci U S A* 106:  
707 6381-6
- 708 28. Ganter GK, Desilets JB, Davis-Knowlton JA, Panaitiu AE, Sweezy M, Sungail J, Tan LC,  
709 Adams AM, Fisher EA, O'Brien JR, Kincaid KM, Heinrich R (2012) *Drosophila* female  
710 precopulatory behavior is modulated by ecdysteroids. *J Insect Physiol* 58: 413-9
- 711 29. Ganter GK, Panaitiu AE, Desilets JB, Davis-Heim JA, Fisher EA, Tan LC, Heinrich R,  
712 Buchanan EB, Brooks KM, Kenney MT, Verde MG, Downey J, Adams AM, Grenier JS,  
713 Maddula S, Shah P, Kincaid KM, O'Brien JR (2011) *Drosophila* male courtship behavior is  
714 modulated by ecdysteroids. *J Insect Physiol* 57: 1179-84
- 715 30. Ganter GK, Walton KL, Merriman JO, Salmon MV, Brooks KM, Maddula S, Kravitz EA  
716 (2007) Increased male-male courtship in ecdysone receptor deficient adult flies. *Behav*  
717 *Genet* 37: 507-12
- 718 31. Li Y, Ma Q, Cherry CM, Matunis EL (2014) Steroid signaling promotes stem cell  
719 maintenance in the *Drosophila* testis. *Devl Biol* 394: 129-41
- 720 32. Qian Y, Dominado N, Zoller R, Ng C, Kudyba K, Siddall NA, Hime GR, Schulz C (2014)  
721 Ecdysone signaling opposes epidermal growth factor signaling in regulating cyst  
722 differentiation in the male gonad of *Drosophila melanogaster*. *Dev Biol* 394: 217-27
- 723 33. Wolfner MF, Partridge L, Lewin S, Kalb JM, Chapman T, Herndon LA (1997) Mating and  
724 hormonal triggers regulate accessory gland gene expression in male *Drosophila*. *J Insect*  
725 *Physiol* 43: 1117-1123

- 726 34. Sharma V, Pandey AK, Kumar A, Misra S, Gupta HPK, Gupta S, Singh A, Buehner NA, Ravi  
727 Ram K (2017) Functional male accessory glands and fertility in *Drosophila* require novel  
728 ecdysone receptor. PLoS Genet 13: e1006788
- 729 35. Jiang H, Patel PH, Kohlmaier A, Grenley MO, McEwen DG, Edgar BA (2009)  
730 Cytokine/Jak/Stat signaling mediates regeneration and homeostasis in the *Drosophila*  
731 midgut. Cell 137: 1343-55
- 732 36. Talbot WS, Swyryd EA, Hogness DS (1993) *Drosophila* tissues with different metamorphic  
733 responses to ecdysone express different ecdysone receptor isoforms. Cell 73: 1323-37
- 734 37. Koelle MR, Talbot WS, Segraves WA, Bender MT, Cherbas P, Hogness DS (1991) The  
735 *Drosophila EcR* gene encodes an ecdysone receptor, a new member of the steroid receptor  
736 superfamily. Cell 67: 59-77
- 737 38. Bernardi F, Romani P, Tzertzinis G, Gargiulo G, Cavaliere V (2009) EcR-B1 and Usp nuclear  
738 hormone receptors regulate expression of the VM32E eggshell gene during *Drosophila*  
739 oogenesis. Dev Biol 328: 541-51
- 740 39. Schubiger M, Carre C, Antoniewski C, Truman JW (2005) Ligand-dependent de-repression  
741 via EcR/USP acts as a gate to coordinate the differentiation of sensory neurons in the  
742 *Drosophila* wing. Development 132: 5239-48
- 743 40. Claudius AK, Romani P, Lamkemeyer T, Jindra M, Uhlirova M (2014) Unexpected role of  
744 the steroid-deficiency protein ecdysoneless in pre-mRNA splicing. PLoS Genet 10: e1004287
- 745 41. Buszczak M, Segraves WA (1998) *Drosophila* metamorphosis: the only way is USP? Curr  
746 Biol 8: R879-82
- 747 42. Yao TP, Segraves WA, Oro AE, McKeown M, Evans RM (1992) *Drosophila* ultraspiracle  
748 modulates ecdysone receptor function via heterodimer formation. Cell 71: 63-72

- 749 43. Cronauer MV, Braun S, Tremmel Ch, Kröncke KD, Spindler-Barth M. (2007) Nuclear  
750 localization and DNA binding of ecdysone receptor and ultraspiracle. Arch Insect Biochem  
751 Physiol. 65: 125-33.
- 752 44. Christianson AM, King DL, Hatzivassiliou E, Casas JE, Hallenbeck PL, Nikodem VM,  
753 Mitsialis SA, Kafatos FC (1992) DNA binding and heteromerization of the *Drosophila*  
754 transcription factor chorion factor 1/ultraspiracle. Proc Natl Acad Sci U S A 89: 11503-7
- 755 45. Hoodless PA, Haerry T, Abdollah S, Stapleton M, O'Connor MB, Attisano L, Wrana JL  
756 (1996) MADR1, a MAD-related protein that functions in BMP2 signaling pathways. Cell 85:  
757 489-500
- 758 46. Schauer S, Burster T, Spindler-Barth M (2012) N- and C-terminal degradation of  
759 ecdysteroid receptor isoforms, when transiently expressed in mammalian CHO cells, is  
760 regulated by the proteasome and cysteine and threonine proteases. Insect Mol Biol 21: 383-  
761 94
- 762 47. Cherbas L, Hu X, Zhimulev I, Belyaeva E, Cherbas P (2003) EcR isoforms in *Drosophila*:  
763 testing tissue-specific requirements by targeted blockade and rescue. Development 130:  
764 271-84
- 765 48. Edgar BA, Zielke N, Gutierrez C. (2014) Endocycles: a recurrent evolutionary innovation  
766 for post-mitotic cell growth. Nat Rev Mol Cell Biol. 15:197-210
- 767 49. Taniguchi K, Kokuryo A, Imano T, Minami R, Nakagoshi H, Adachi-Yamada T. (2014)  
768 Isoform-specific functions of Mud/NuMA mediate binucleation of *Drosophila* male accessory  
769 gland cells. BMC Dev Biol. 14:46
- 770 50. Calvi BR, Lilly MA, Spradling AC. (1998) Cell cycle control of chorion gene amplification.  
771 Genes Dev. 12:734-44.

- 772 51. Weiss A, Herzig A, Jacobs H, Lehner CF (1998) Continuous Cyclin E expression inhibits  
773 progression through endoreduplication cycles in *Drosophila*. *Curr Biol* 8: 239-42
- 774 52. Zheng X, Wang J, Haerry TE, Wu AY, Martin J, O'Connor MB, Lee CH, Lee T (2003) TGF-  
775 beta signaling activates steroid hormone receptor expression during neuronal remodeling in  
776 the *Drosophila* brain. *Cell* 112: 303-15
- 777 53. Boulanger A, Farge M, Ramanoudjame C, Wharton K, Dura JM (2012) *Drosophila* motor  
778 neuron retraction during metamorphosis is mediated by inputs from TGF-beta/BMP  
779 signaling and orphan nuclear receptors. *PloS One* 7: e40255
- 780 54. Costantino BF, Bricker DK, Alexandre K, Shen K, Merriam JR, Antoniewski C, Callender JL,  
781 Henrich VC, Presente A, Andres AJ (2008) A novel ecdysone receptor mediates steroid-  
782 regulated developmental events during the mid-third instar of *Drosophila*. *PLoS Genet* 4:  
783 e1000102
- 784 55. Caceres L, Nilson LA (2005) Production of gurken in the nurse cells is sufficient for axis  
785 determination in the *Drosophila* oocyte. *Development* 132: 2345-53
- 786 56. Sitnik JL, Gligorov D, Maeda RK, Karch F, Wolfner MF (2016) The female post-mating  
787 response requires genes expressed in the secondary cells of the male accessory gland in  
788 *Drosophila melanogaster*. *Genetics* 202: 1029-41
- 789 57. Kwon SJ, Lee GT, Lee JH, Iwakura Y, Kim WJ, Kim IY (2014) Mechanism of pro-tumorigenic  
790 effect of BMP-6: neovascularization involving tumor-associated macrophages and IL-1a.  
791 *Prostate* 74: 121-33
- 792 58. Lee GT, Jung YS, Ha YS, Kim JH, Kim WJ, Kim IY (2013) Bone morphogenetic protein-6  
793 induces castration resistance in prostate cancer cells through tumor infiltrating  
794 macrophages. *Cancer Sci* 104: 1027-32

- 795 59. Lee GT, Kang DI, Ha YS, Jung YS, Chung J, Min K, Kim TH, Moon KH, Chung JM, Lee DH,  
796 Kim WJ, Kim IY (2014) Prostate cancer bone metastases acquire resistance to androgen  
797 deprivation via WNT5A-mediated BMP-6 induction. *Br J Cancer* 110: 1634-44
- 798 60. Colombani J, Bianchini L, Layalle S, Pondeville E, Dauphin-Villemant C, Antoniewski C,  
799 Carre C, Noselli S, Leopold P (2005) Antagonistic actions of ecdysone and insulins determine  
800 final size in *Drosophila*. *Science* 310: 667-70
- 801 61. Lee T, Marticke S, Sung C, Robinow S, Luo L (2000) Cell-autonomous requirement of the  
802 USP/EcR-B ecdysone receptor for mushroom body neuronal remodeling in *Drosophila*.  
803 *Neuron* 28: 807-18
- 804 62. Sander V, Eivers E, Choi RH, De Robertis EM (2010) *Drosophila* Smad2 opposes Mad  
805 signaling during wing vein development. *PLoS One* 5: e10383
- 806 63. Chapman T, Bangham J, Vinti G, Seifried B, Lung O, Wolfner MF, Smith HK, Partridge L  
807 (2003) The sex peptide of *Drosophila melanogaster*: female post-mating responses analyzed  
808 by using RNA interference. *Proc Natl Acad Sci U S A* 100: 9923-8
- 809 64. Perkins LA, Holderbaum L, Tao R, Hu Y, Sopko R, McCall K, Yang-Zhou D, Flockhart I,  
810 Binari R, Shim HS, Miller A, Housden A, Foos M, Randkeltv S, Kelley C, Namgyal P, Villalta C,  
811 Liu LP, Jiang X, Huan-Huan Q et al. (2015) The Transgenic RNAi Project at Harvard Medical  
812 School: Resources and Validation. *Genetics* 201: 843-52
- 813 65. Patel NH, Snow PM, Goodman CS (1987) Characterization and cloning of fasciclin III: a  
814 glycoprotein expressed on a subset of neurons and axon pathways in *Drosophila*. *Cell* 48:  
815 975-88
- 816 66. Rylett CM, Walker MJ, Howell GJ, Shirras AD, Isaac RE (2007) Male accessory glands of  
817 *Drosophila melanogaster* make a secreted angiotensin I-converting enzyme (ANCE),

818 suggesting a role for the peptide-processing enzyme in seminal fluid. Journal Exp Biol 210:  
819 3601-6  
820 67. Daul AL, Komori H, Lee CY (2010) EdU (5-ethynyl-2'-deoxyuridine) labeling of Drosophila  
821 mitotic neuroblasts. Cold Spring Harb Protoc 2010: pdb.prot5461  
822

823 **Supplementary Figures**

824

825 **Figure S1.** BMP signalling and the EcR synergise to regulate SC growth. Dissected accessory  
826 glands from 6-day-old males were stained with an antibody against Fasciclin3 to mark the  
827 apical outlines of SCs and neighbouring MCs (yellow) and with DAPI (blue nuclei). Selected  
828 SC nuclei are marked with red arrows and express GFP and other transgenes under *esg<sup>tsF/O</sup>*  
829 control. A, B. RNAi-mediated knockdown of *Usp* has no effect on SC nuclear growth (B)  
830 compared to control (A). D-G. Over-expression of the –A (D) and –B2 (F) isoforms of EcR has  
831 no effect on SC nuclear growth, but co-expression of these isoforms with *Tkv<sup>ACT</sup>*  
832 synergistically promotes growth (E, G). H. RNAi-mediated knockdown of a control gene, *ry*,  
833 had no effect on growth. I. Histogram showing size of SC nuclei relative to MC nuclei in AGs  
834 where SCs express different transgenes as above. Significance was assessed by two-way  
835 ANOVA. \*\*\* $p < 0.0001$ ,  $n = 15$ . Scale bars, 60  $\mu\text{m}$ .

836 **Figure S2.** BMP signalling, but not *Usp*, regulates levels of the EcR protein in SCs. Images  
837 show the AG epithelium dissected from 6-day-old virgin males expressing nuclear GFP and  
838 other transgenes under *esg<sup>tsF/O</sup>* control, and stained with a pan-EcR antibody (A-G) or anti-  
839 *Usp* antibody (H,I). Nuclei are stained with DAPI (blue). Selected SC nuclei are marked with  
840 red arrows. A, B. *Usp* knockdown (B) has no effect on EcR expression compared to control  
841 (A). C-G. Overexpression of EcR-A (D) or EcR-B2 (F) does not appear to significantly alter EcR  
842 expression compared to controls (A). Co-expression of these isoforms with *Tkv<sup>ACT</sup>* in SCs (E  
843 and G respectively) increases EcR expression in SCs compared to controls (A) and SCs  
844 expressing *Tkv<sup>ACT</sup>* alone (C). H,I Immunostaining with an antibody that recognises *Usp* reveals  
845 expression in the nuclei of control SCs (H), but absence of expression in the nuclei of SCs  
846 expressing an RNAi targeting *Usp* (I). Scale bars, 60  $\mu\text{m}$  (A-G), 120  $\mu\text{m}$  (H, I).

847

848 **Figure S3.** BMP signalling does not regulate levels of the EcR protein in main cells. Images  
849 show the AG epithelium dissected from 6-day-old virgin males expressing nuclear GFP and  
850 other transgenes in main cells under *Acp26Aa-GAL4* control, and stained with a pan-EcR  
851 antibody. Nuclei are stained with DAPI (blue). A, B. Expression of *Tkv<sup>ACT</sup>* in main cells (B),  
852 which do not normally express EcR (see control cells in A) does not affect EcR levels. C-J.  
853 Expression of EcR-B1 (C), -B2 (E), -A (G), and –C (I) in main cells leads to accumulation of EcR  
854 in these cells, in contrast to SCs. Co-expression with *Tkv<sup>ACT</sup>* does not appear to alter either  
855 the levels or subcellular localisation of EcR (D, F, H, J). Scale bars, 100  $\mu\text{m}$ .

Figure 1

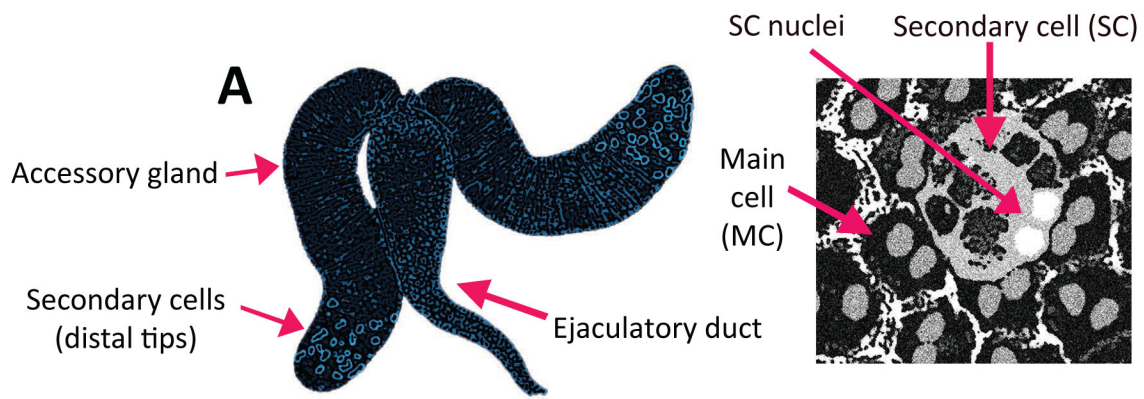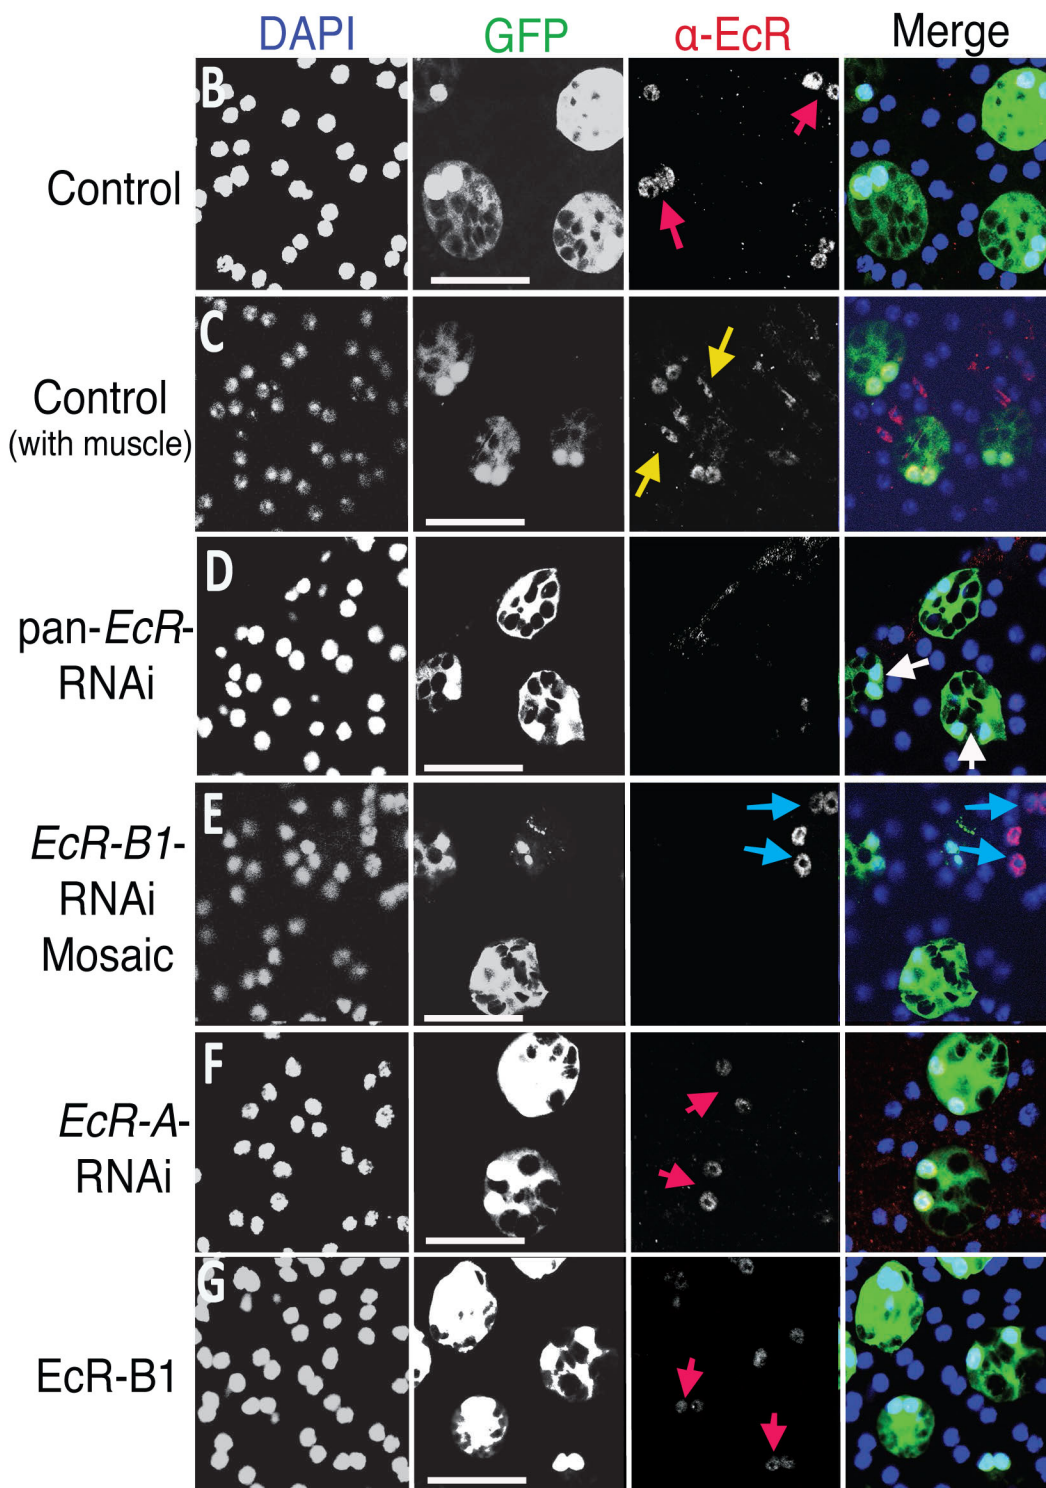



Figure 2

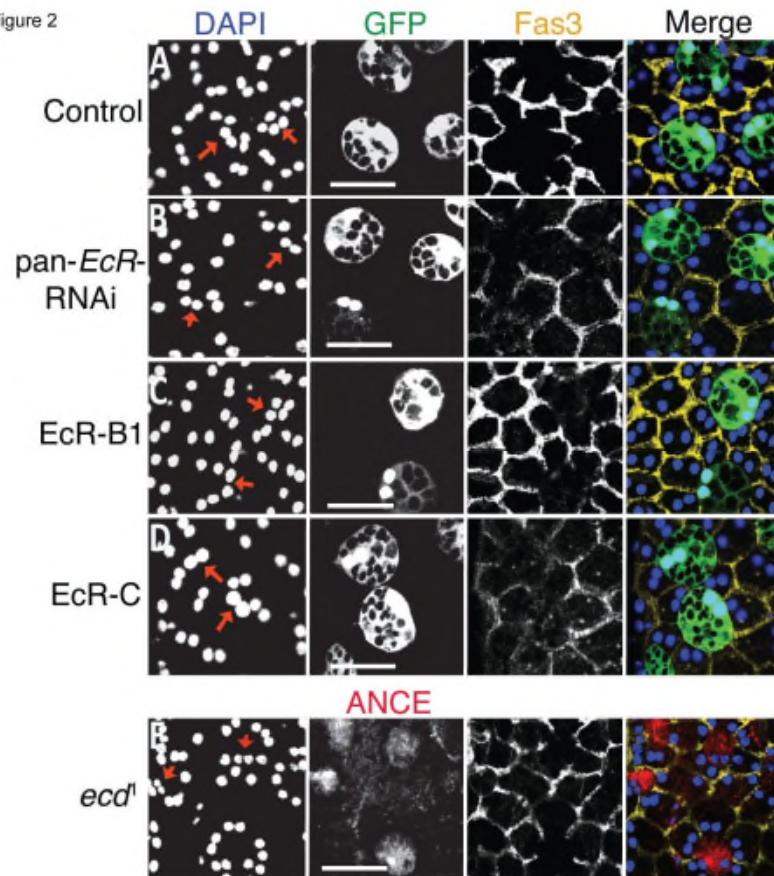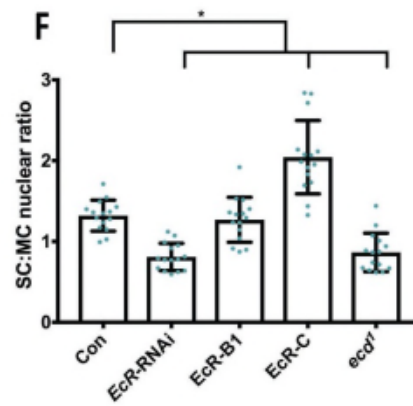

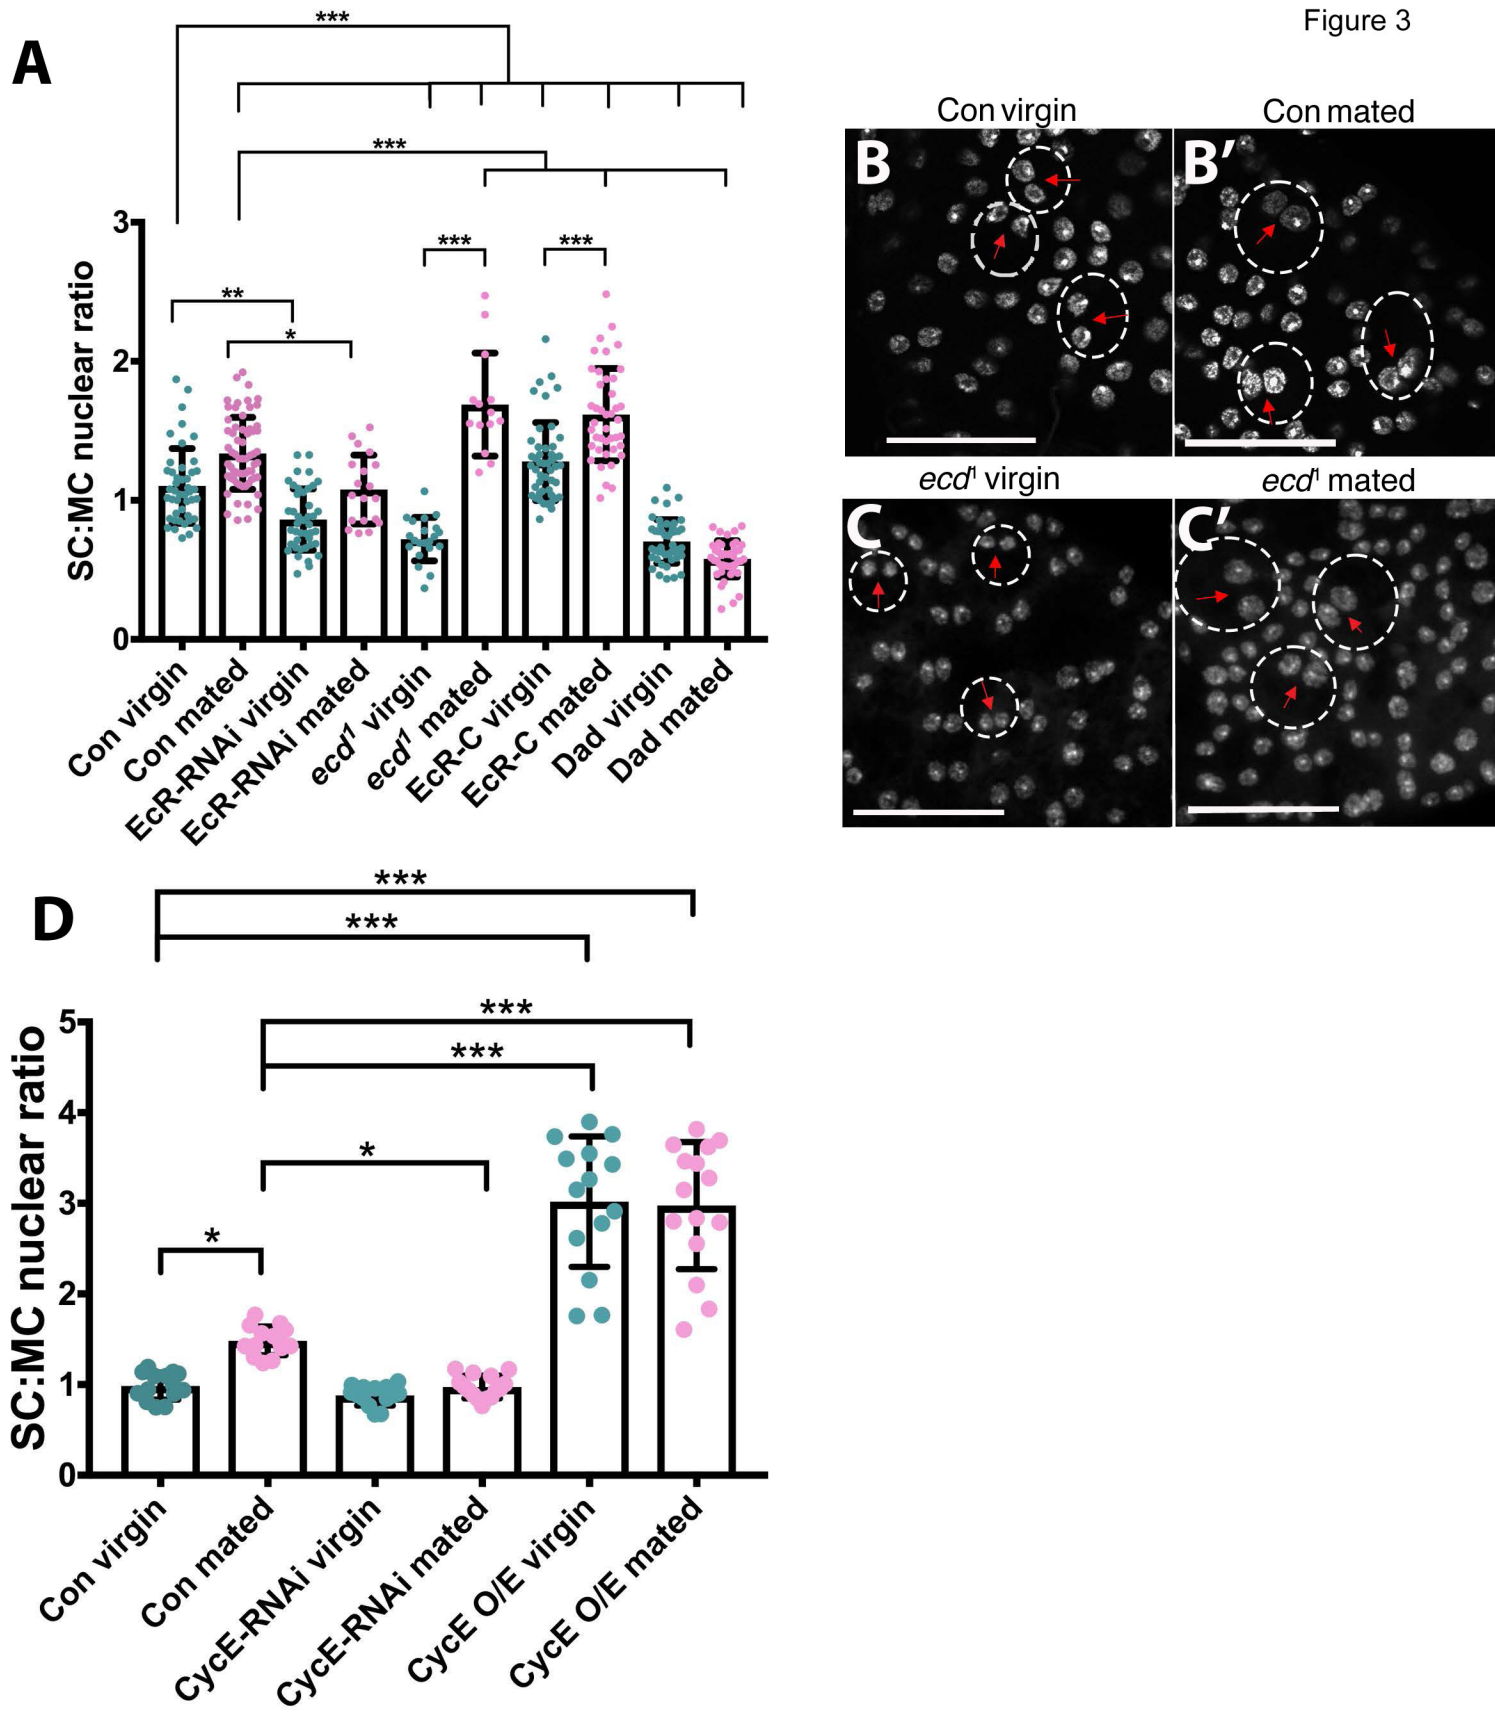

Figure 4

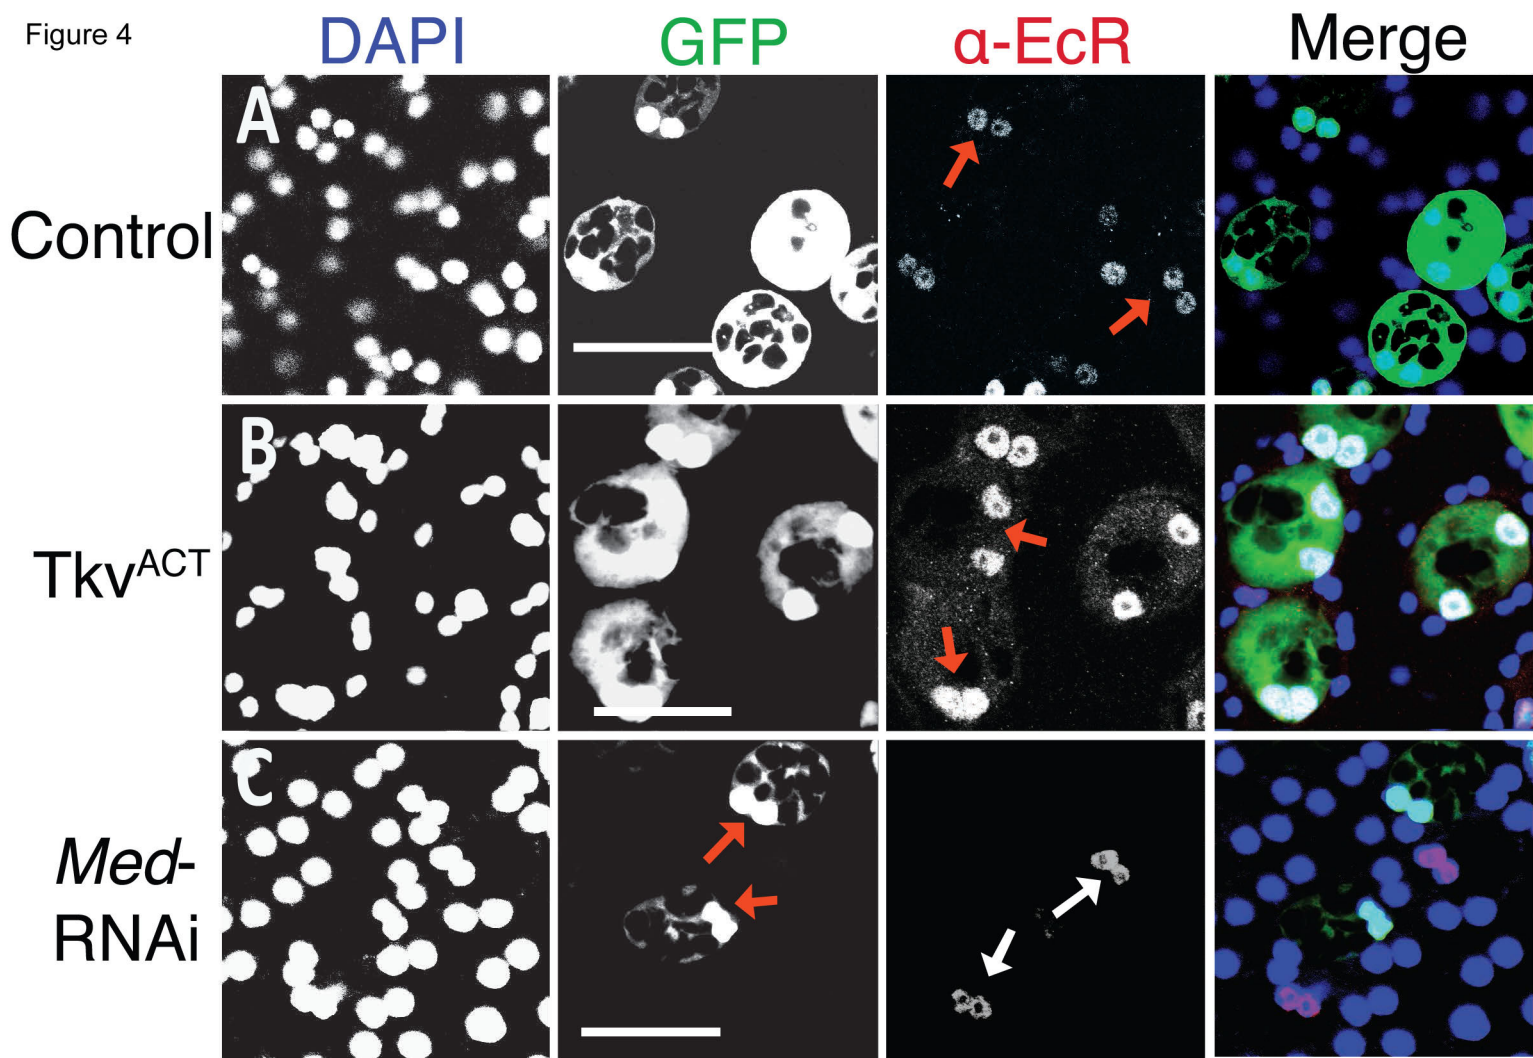

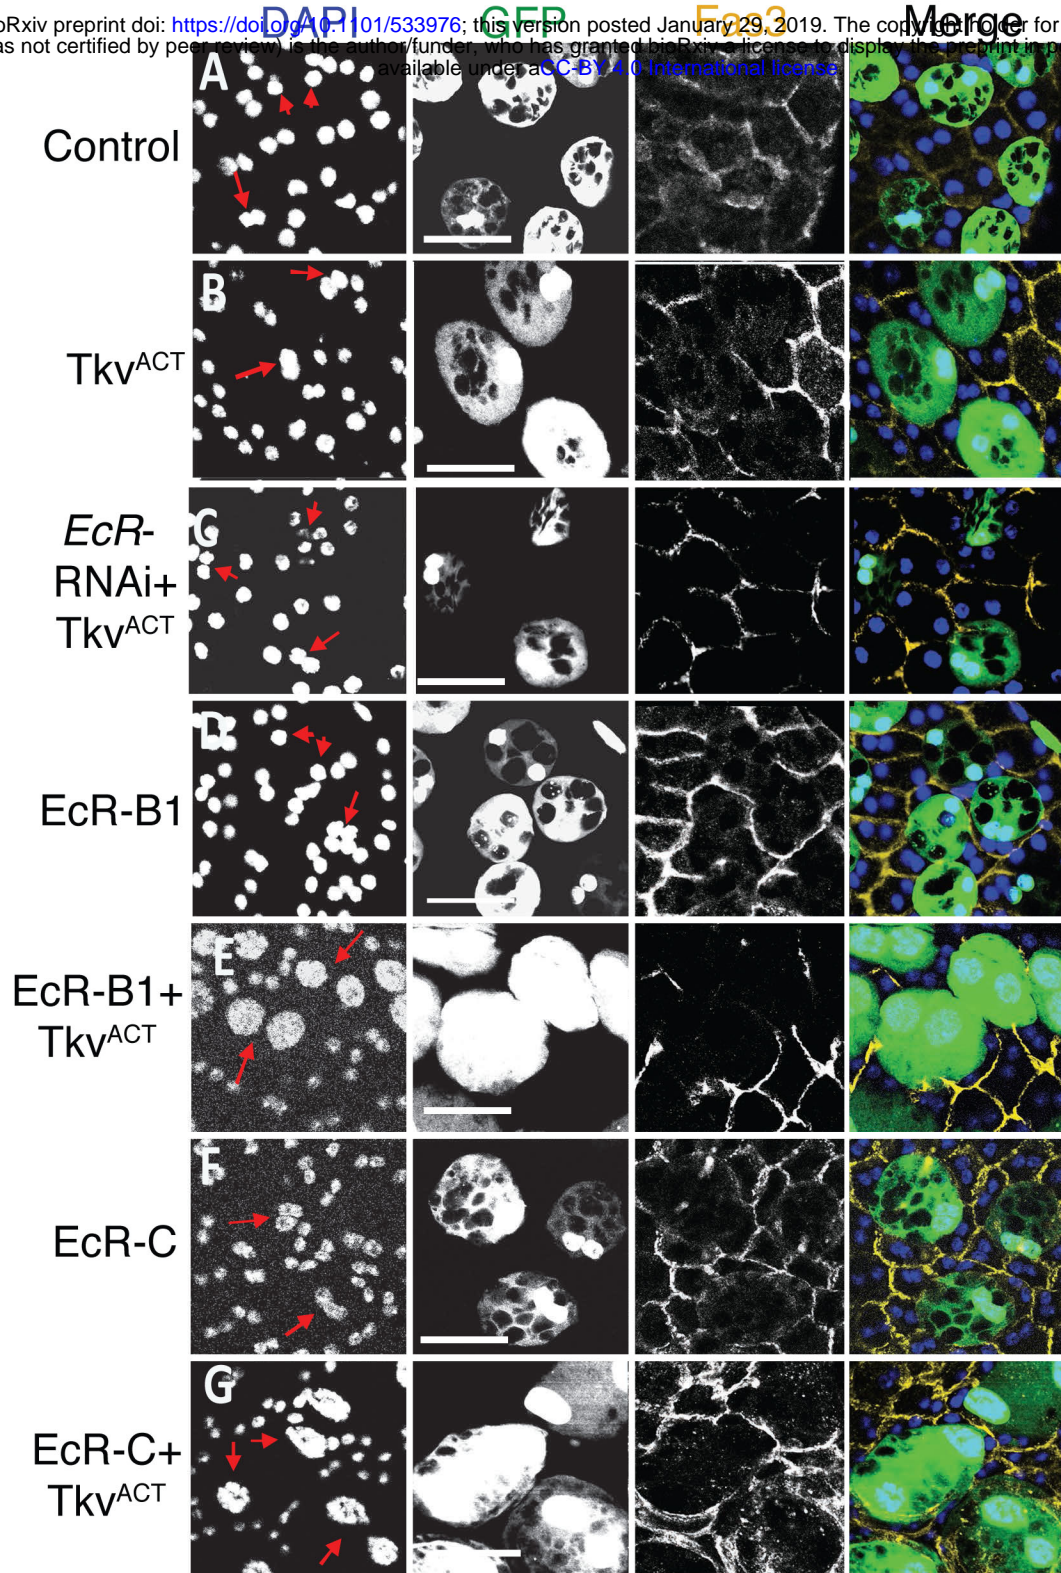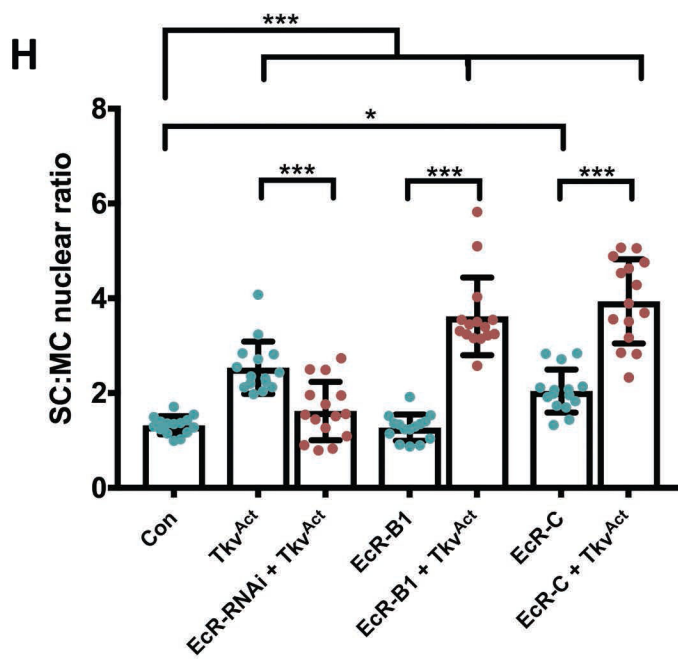

Figure 6

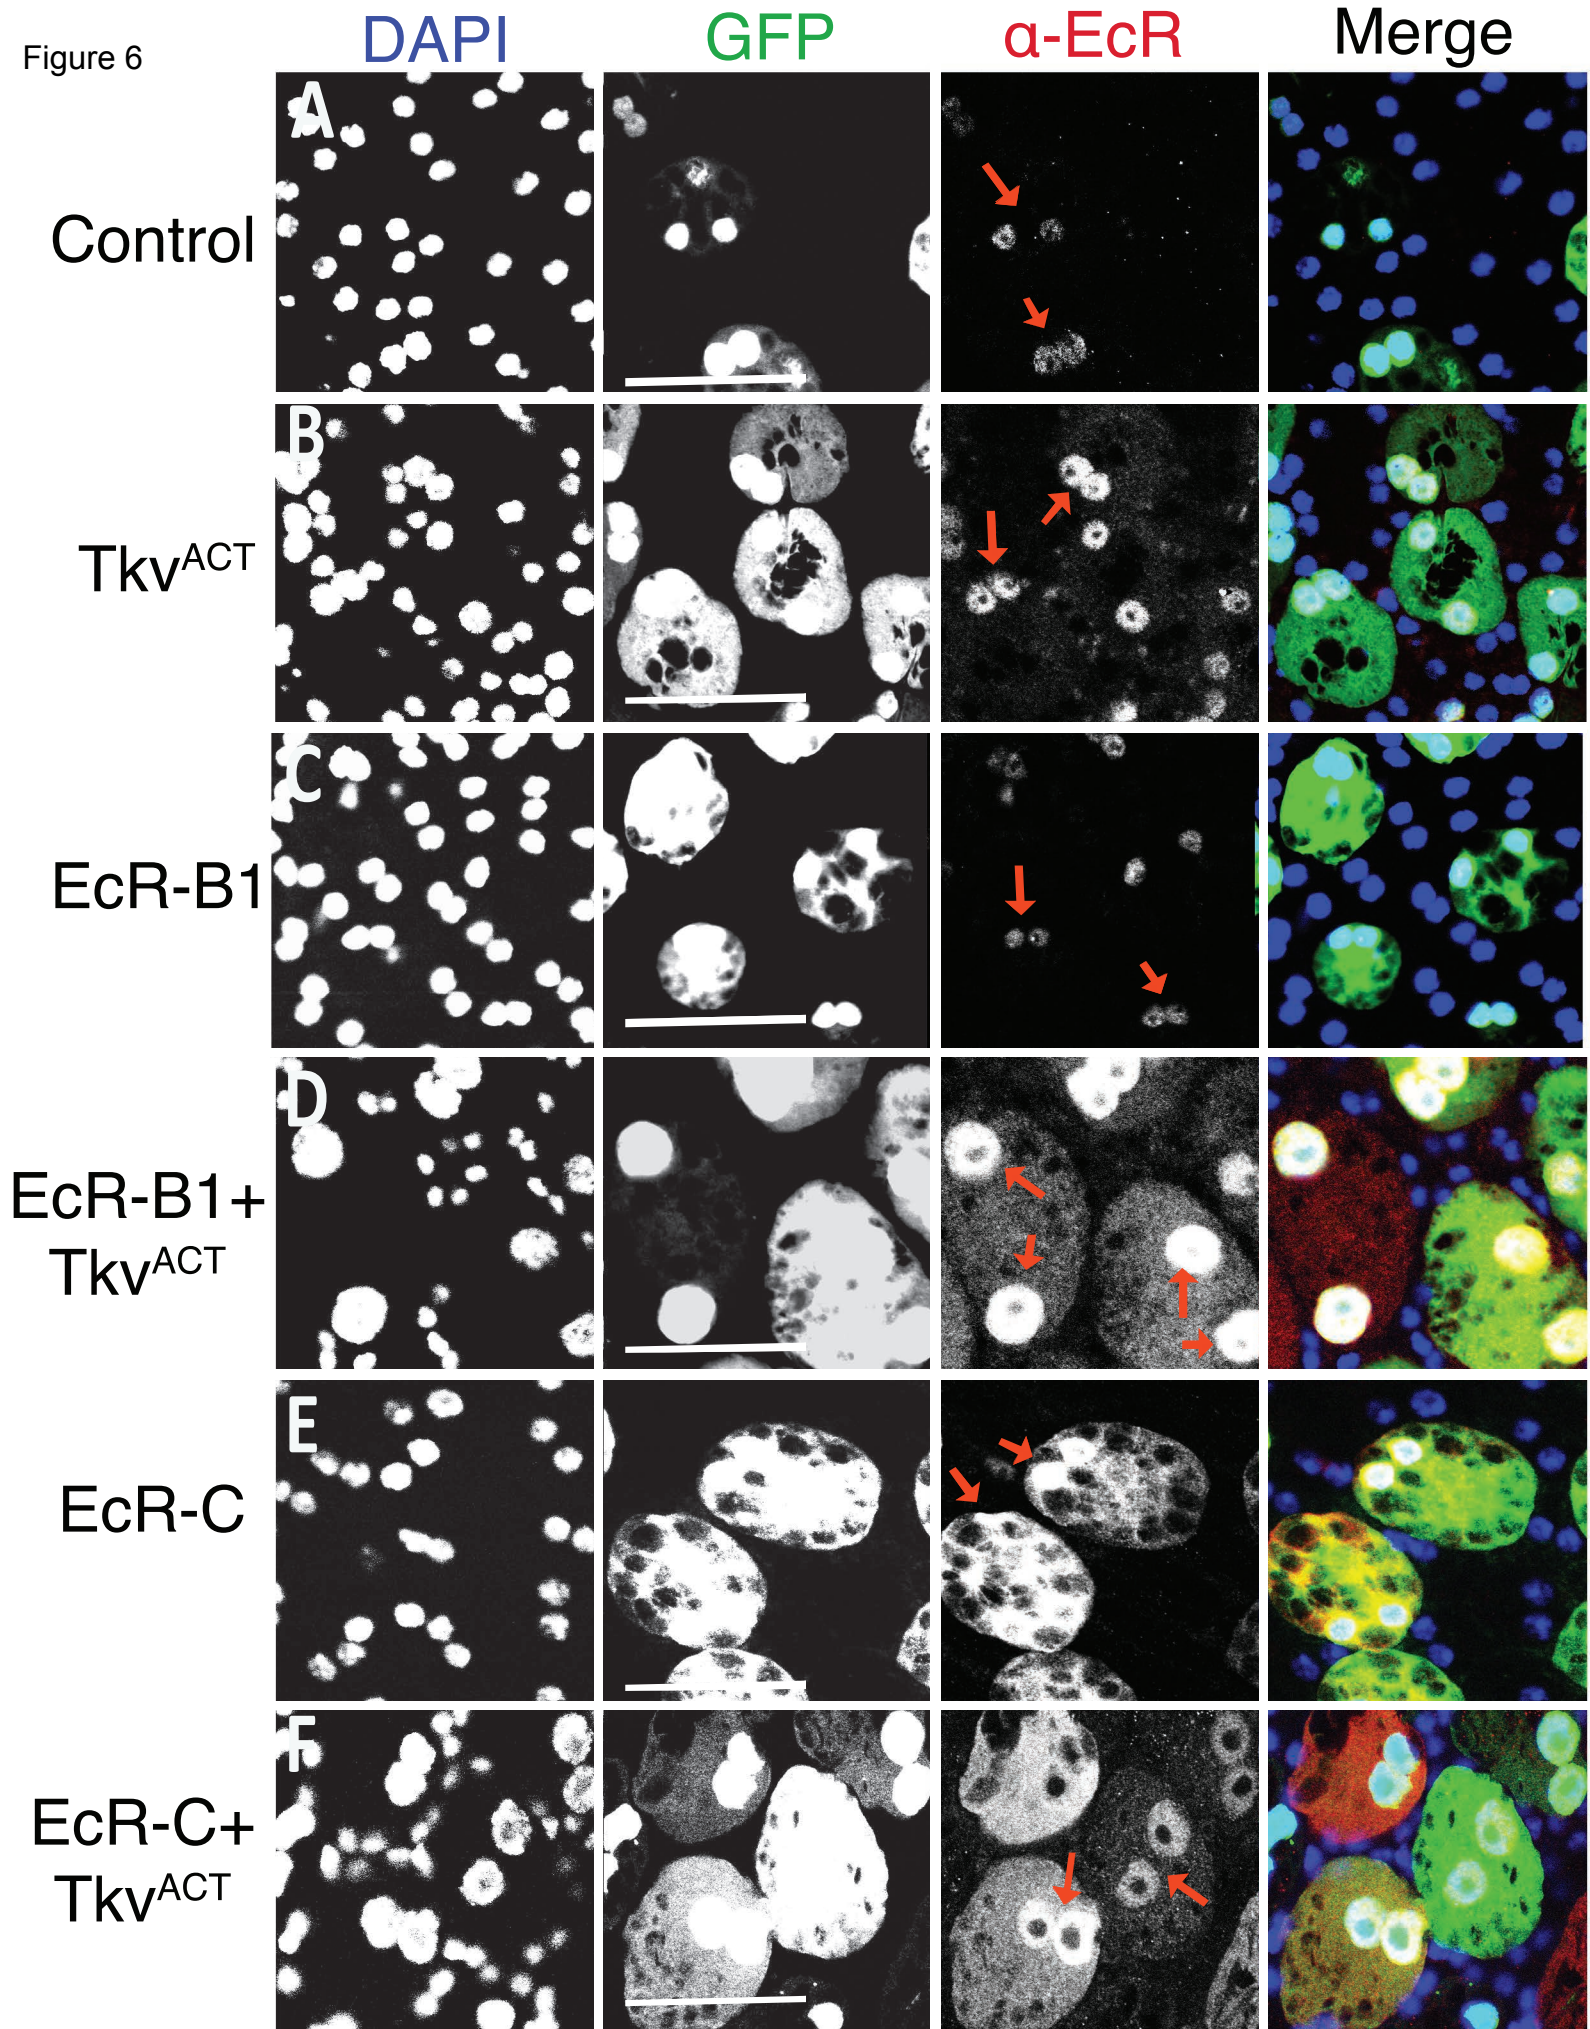

Figure 7

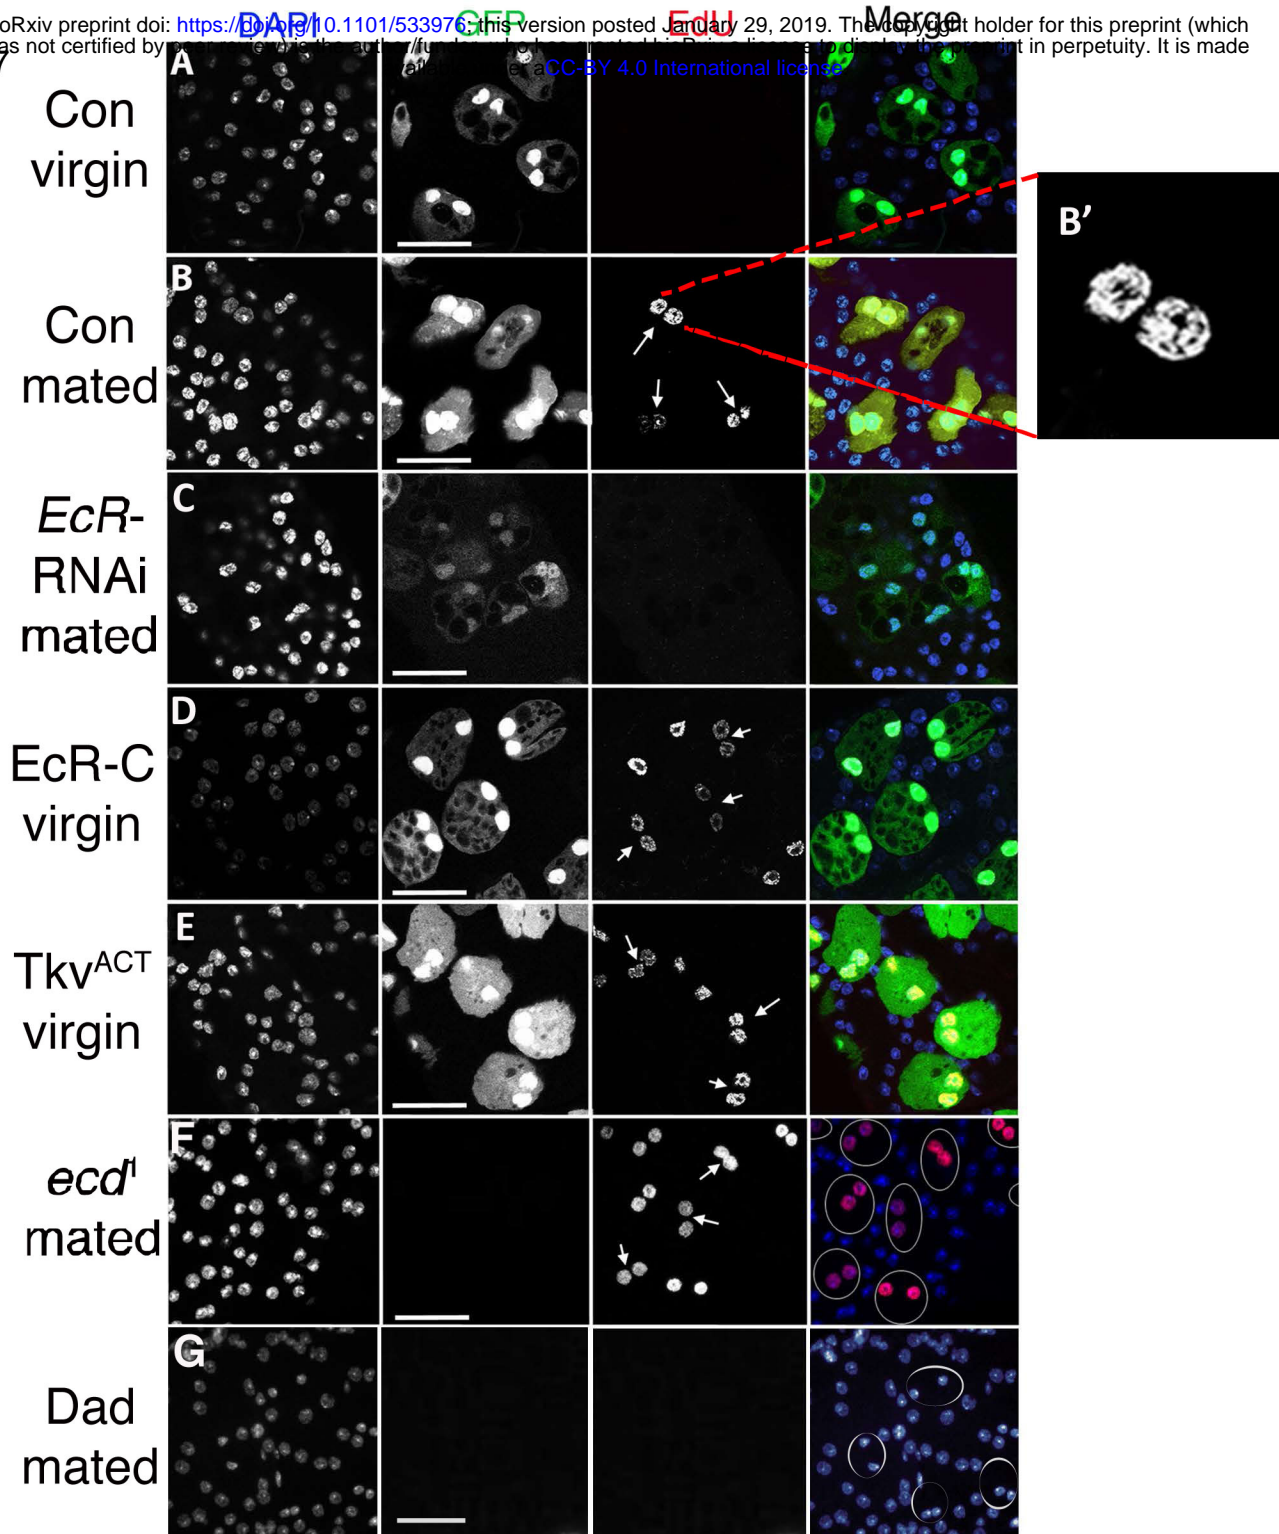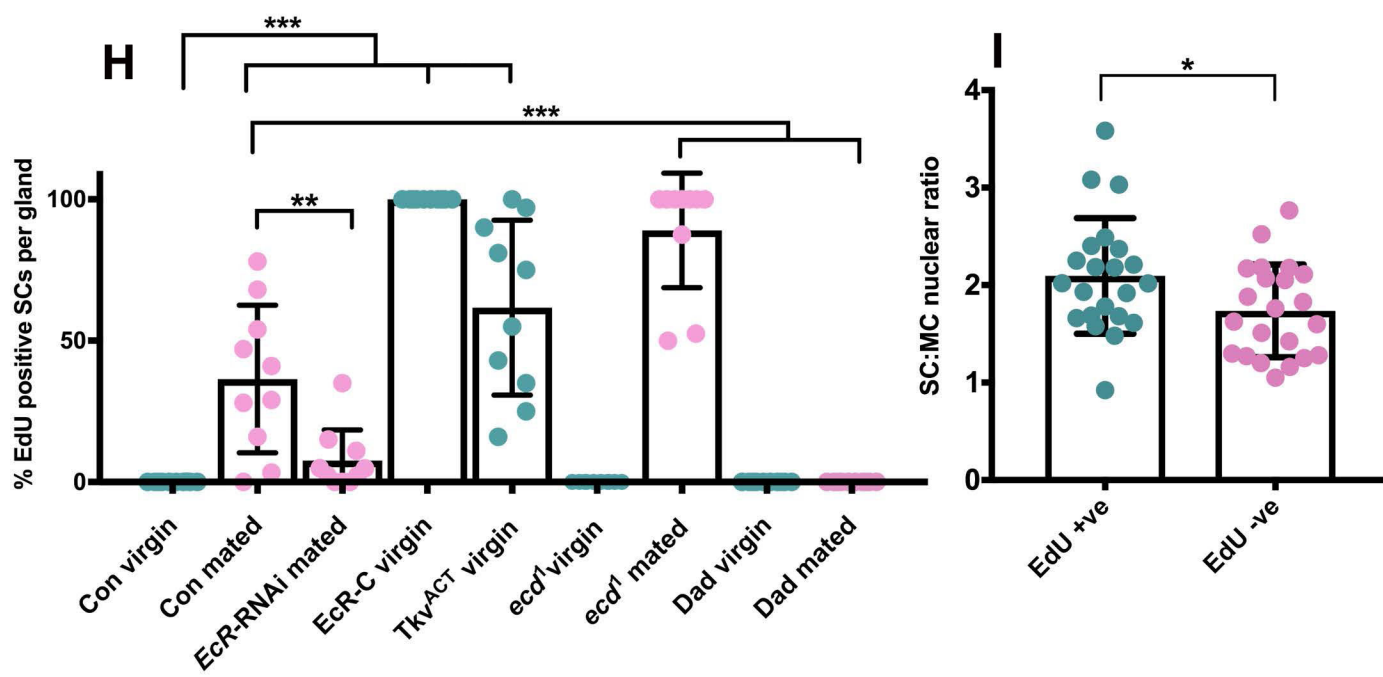

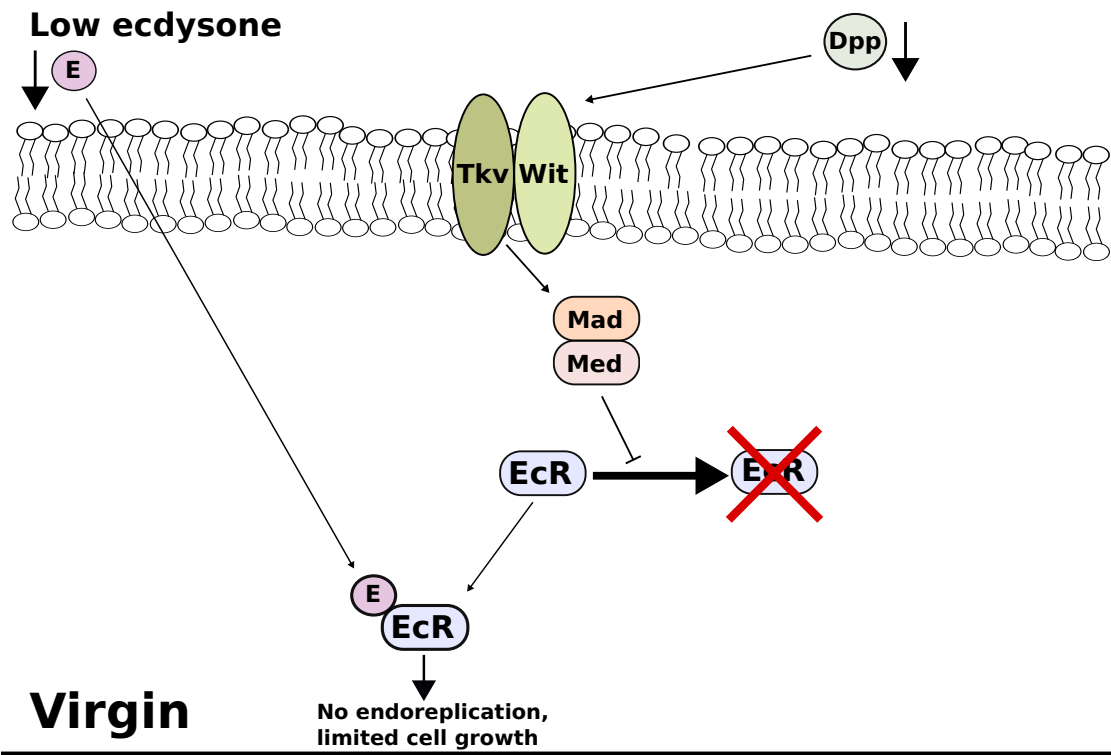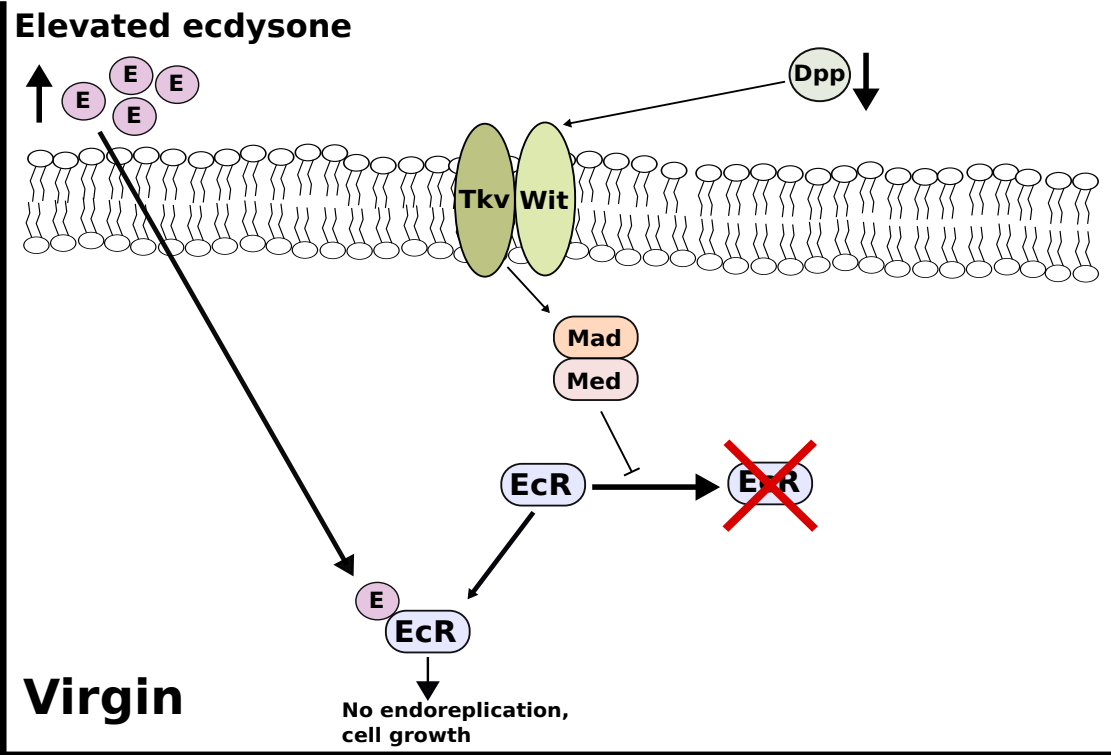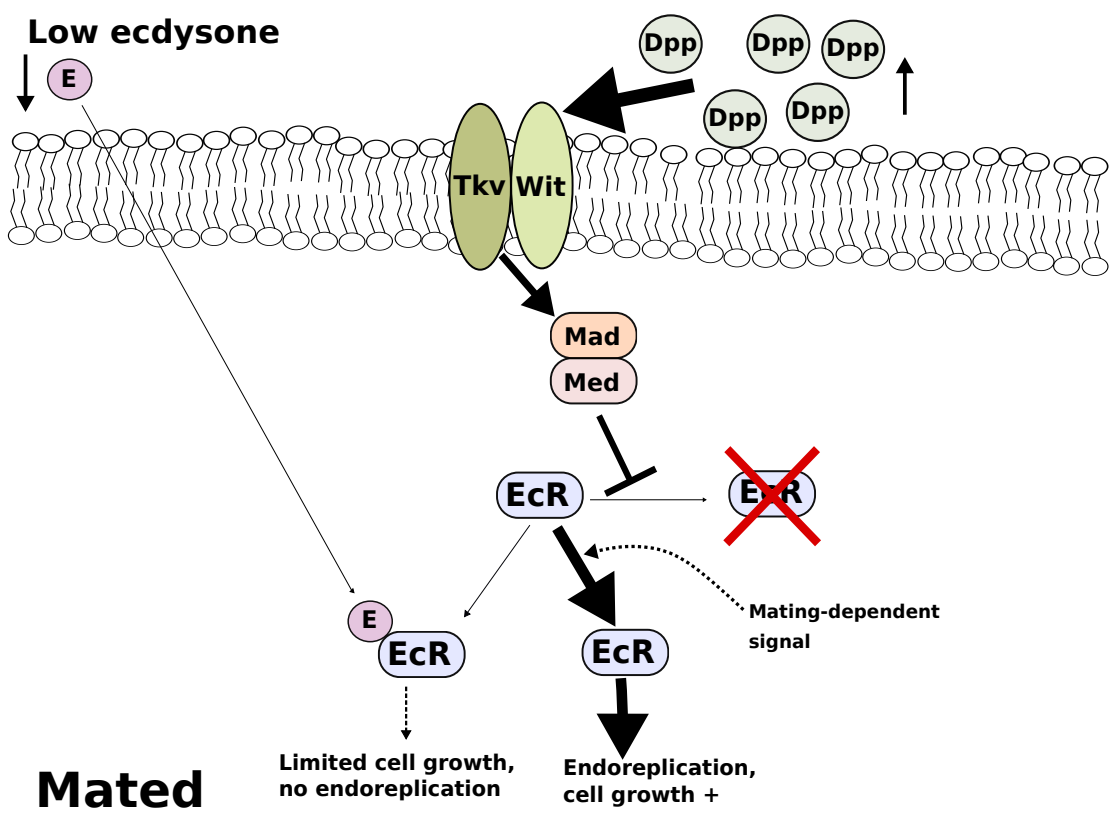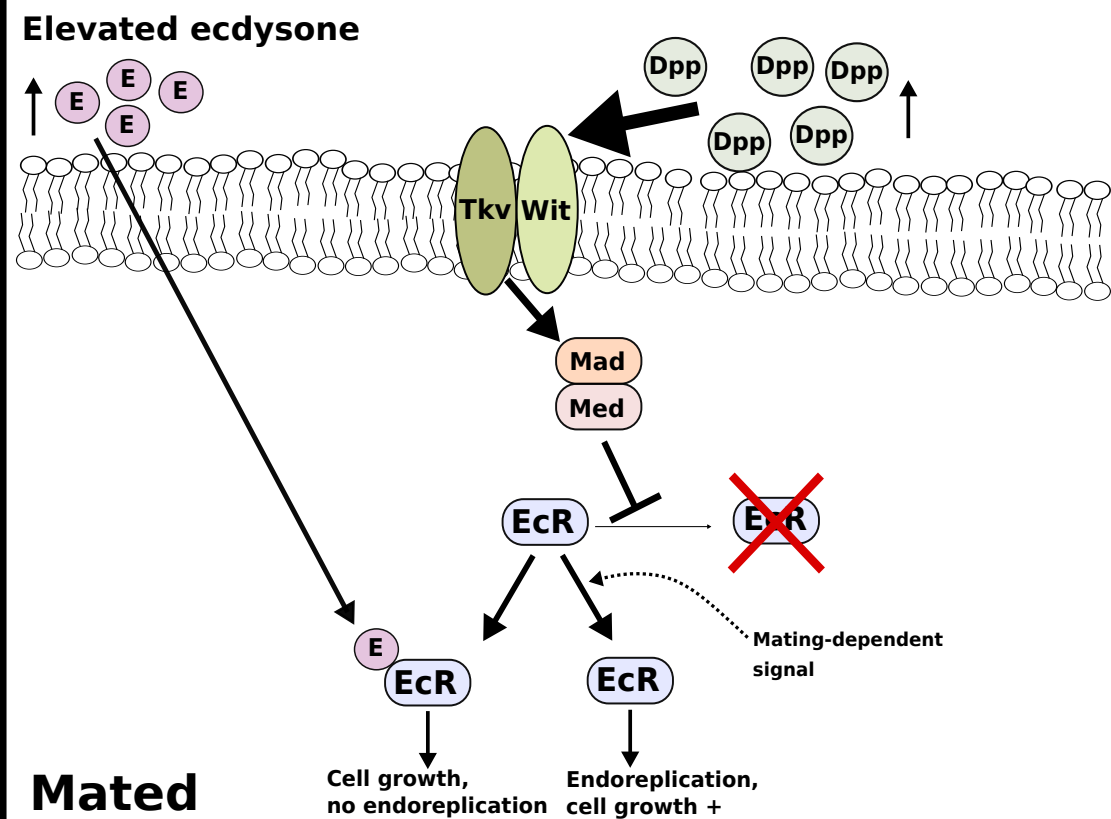

Figure S1

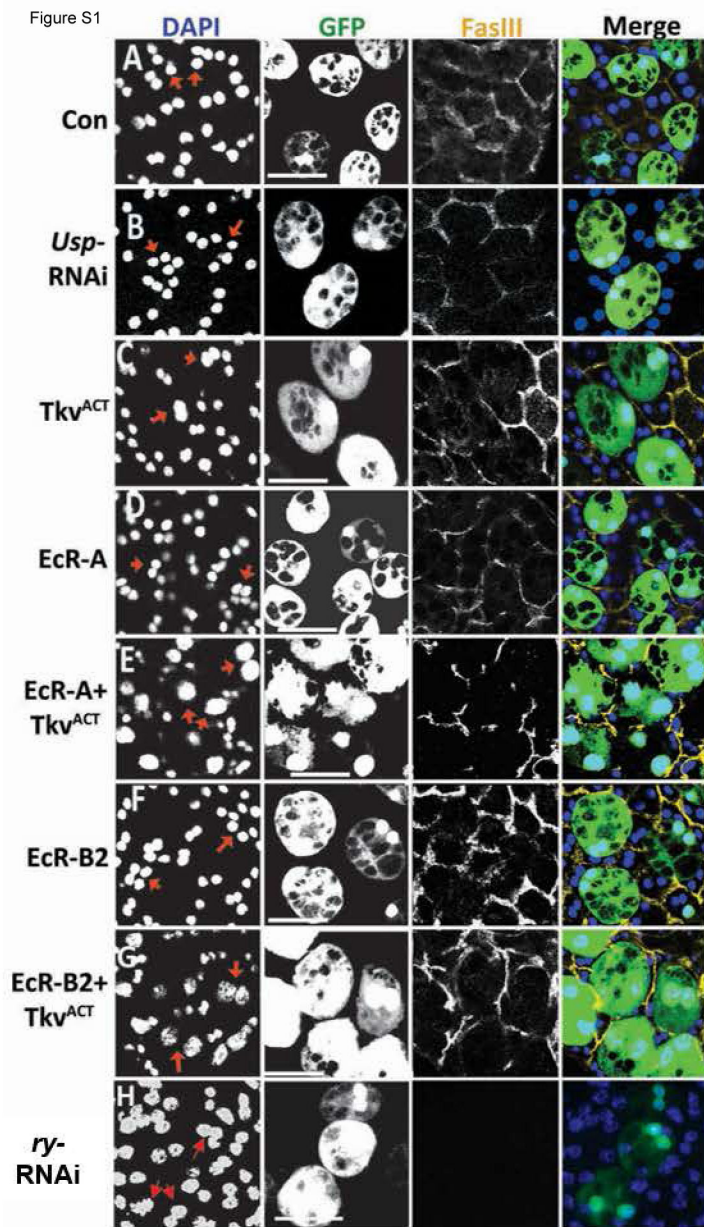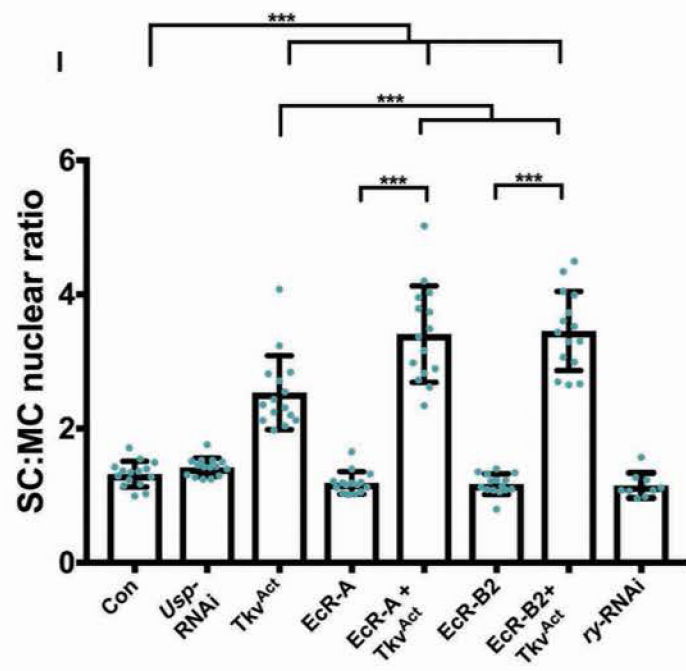



Figure S2

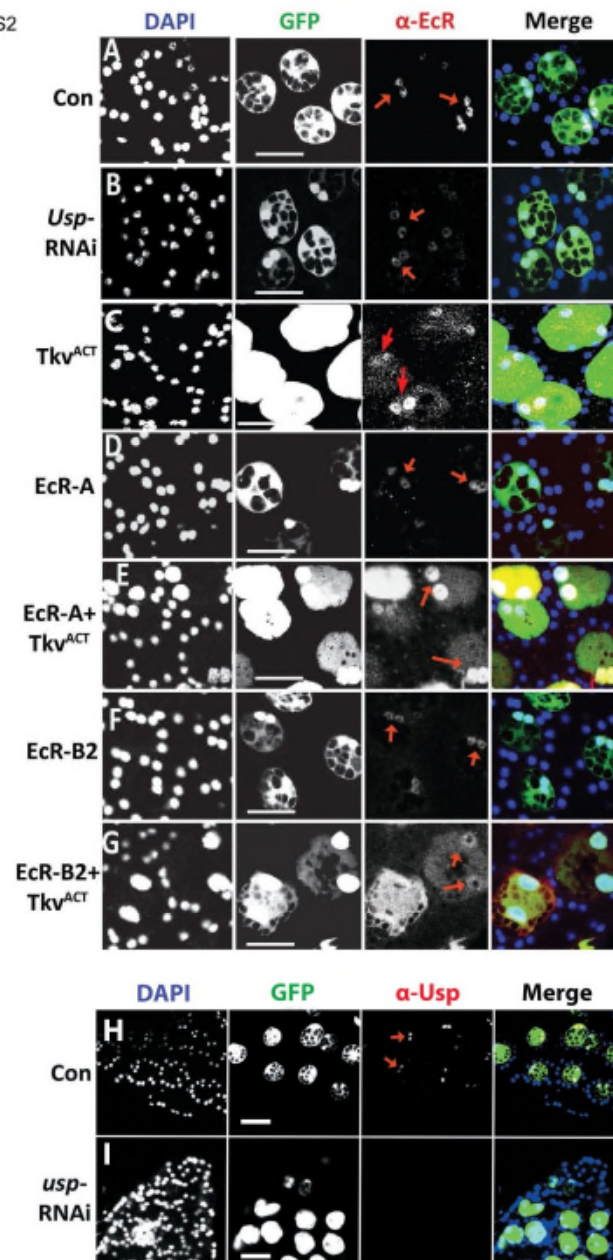

Figure S3

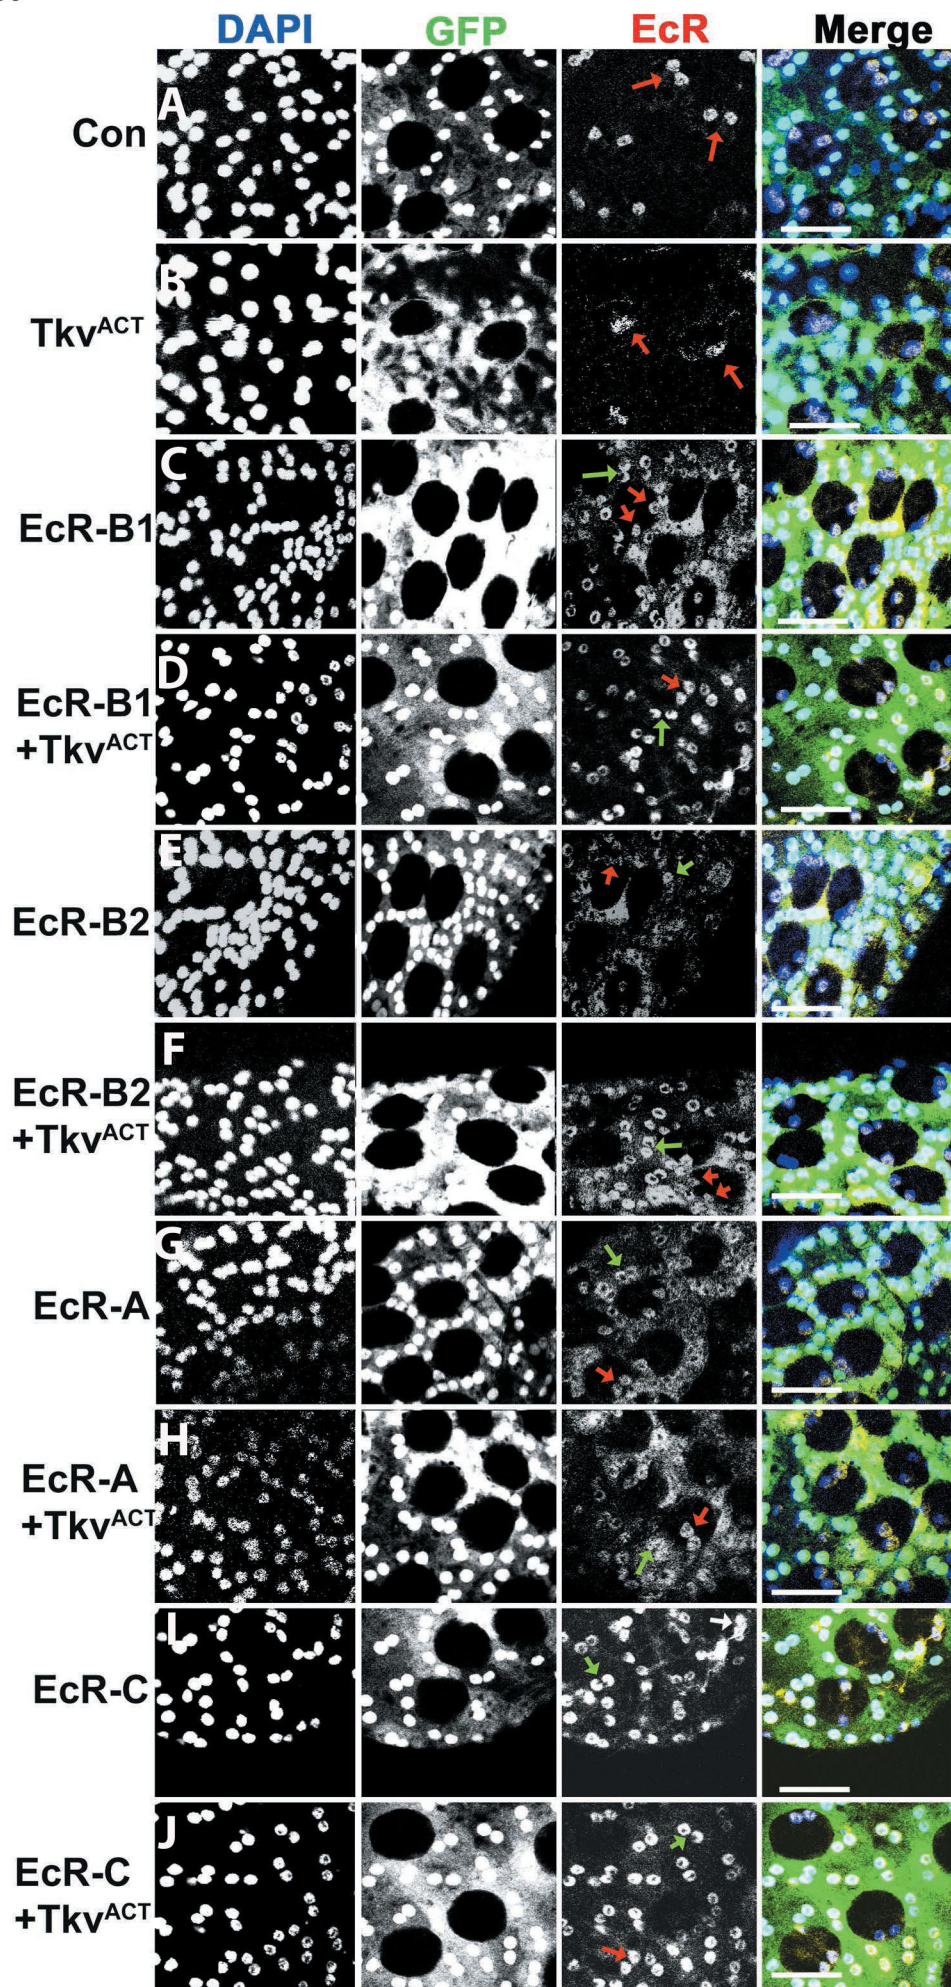

## Funding statement

We gratefully acknowledge the Biotechnology and Biological Sciences Research Council (BBSRC; <https://bbsrc.ukri.org/>; BB/K017462/1, BB/L007096/1, BB/N016300/1, BB/R004862/1 to CG, MW, DCIG,CW), Cancer Research UK (<https://www.cancerresearchuk.org/>; C19591/A19076 to PM,DCIG,CW), the Cancer Research UK Oxford Centre Development Fund (C38302/A12278 to DCIG,FH,CW), the John Fell Fund, Oxford (141/063 to FH,CW), the Medical Research Council (MRC; <https://mrc.ukri.org/>; #1530147 and #1252459 to SR and JEEUH), the Urology Foundation (<https://www.theurologyfoundation.org/>; to AL), and the Wellcome Trust (<https://wellcome.ac.uk/>; Strategic Awards #091911, #107457; MICRON imaging facility) for grants, studentships and scholarships supporting this work. The funders had no role in study design, data collection and analysis, decision to publish, or preparation of the manuscript.
